# Supplementary material for: The use of social media as a two-way mirror for narcissistic adolescents from Austria, Belgium, South-Korea, and Spain
Source: PLoS One. 2022 Aug 31;17(8):e0272868. doi: 10.1371/journal.pone.0272868 (PMC9432699; doi:10.1371/journal.pone.0272868)
Supplement: S1 Data — (XLSX) [file pone.0272868.s001.xlsx]

## Sheet: Sheet 1 - Data
Data
Filter 2	Country_Code	Country Individualism	Country Individualism NOT OK	C	Unique_Code	AV1.1.D	AV1.1.M	AV1.1.J	AV1.1.S	Gender	CountryGender	aid_d	aid_m	aid_j	AV1.2	AV1.2_professionfather	AV1.3	AV1.3_professionmother	AV1.4	AV1.4_country	AV1.5.A	AV1.5.A_country	AV1.5.B	AV1.5.B_mothertongue	AV1.6	AV1.7	AV1.8.1	AV1.8.2	AV1.8.3	AV1.8.4	AV1.9.1	AV1.9.2	AV1.9.3	AV1.9.4	AV1.10.1	AV1.10.2	AV1.10.3	AV1.10.4	AV1.11.1	AV1.11.2	AV1.11.a	AV1.11.b	AV1.12	AV1.13_hours	AV1.13_minutes	AV1.14.1	AV1.14.2	AV1.14.3	AV1.14.4
0	2	High	3	Belgium	291A276	4	5	2004	Middens	2	4	13	3	2017	5		1		2		5	Turkey	2			1	4		4		5	5	5	5	5	7	7	5	4	4	7	7	2	1	30	5	7		6
0	2	High	3	Belgium	291A275	23	5	2002	Middens	2	4	13	3	2017	5				2		5	Turkey	5	Turkish	1	1	4		4	5	4	5	5	5	3	5	5	5	5	4		5	2	2	30			4	4
0	2	High	3	Belgium	291A274	28	6	2003	Middens	1	2	13	3	2017	5		5		2		5	Turkey	2		1	3	1	3	3	5	5	3	6	6	7	7	7	7	3	5	3	3	4	10		4	5	5	4
0	2	High	3	Belgium	291A273	5	6	2002	Middens	1	2	13	3	2017		heating		own store for glasses	2		2		5	Turkish	4	1	5	6	7		7	4	3	4	7	6	7	7	4	4	4	4	3	1	30	4	4	5	4
0	2	High	3	Belgium	291A272	11	9	2003	Middens	1	2	13	3	2017	1		1		2		5	italy	5	Italian	1	3	5	2	5	6	2	3	5	5	3	3	5	2	2	2	3	3	1			2	5	2	5
0	2	High	3	Belgium	291A271	5	2	2004	Middens	1	2	13	3	2017	4		4		2		5	Morrocco	2		1	1	5	5	4	4	5	4	4	4	6	5	4	5	4	5	2	3	3	4	30	4	4	4	3
0	2	High	3	Belgium	291A270	21	6	2003	Middens	2	4	13	3	2017					2		2		2		1	5	5	4	5	4	5	6	4	7	7	7	4	6	5	5	1	1	3	5	0	4	5	4	3
0	2	High	3	Belgium	291A269	18	1	2003	Middens	1	2	13	3	2017		biologist		teacher	2		5	The Neth	2		1	1	5	3	4	3	6	6	5	6	7	7	7	7	1	5	1	1	2	1		4	3	3	3
0	2	High	3	Belgium	291A268	5	5	2002	Middens	2	4	13	3	2017	4		1		2		5	Turkey	5	Turkish	1	3	5	1	1	1	5	1	1	1	5	5	5	5	4	4	5	5	1			1	5	4	4
0	2	High	3	Belgium	291A267	25	3	2003	Middens	2	4	13	3	2017				kindergarten teacher	2		2		2		1	1	3	3	3	3	5	4	3	5	7	6	4	6	7	7	4	4	3	4	0	5	6	4	6
0	2	High	3	Belgium	291A266	7	4	2002	Middens	2	4	13	3	2017	3		2		2		2		2		1	1	5	2	3	4	5	4	5	5	5	4	6	4	4	4	5	4	1			5	5	4	3
0	2	High	3	Belgium	291A265	14	9	2003	Middens	2	4	13	3	2017	2		1		5	Kosovo	5	Kosovo	5	Albanese	1	4	4	1	3	4	5	5	6	5	5	2	4	3	4	3	5	5	2	1	0	1	3	3	3
0	2	High	3	Belgium	291A264	1	4	2004	Middens	1	2	13	3	2017	3		3		2		2		2		1	1	7	4	3	4	4	4	5	5	6	5	5	7	6	6	2	1	2	2	0	4	3	1	4
0	2	High	3	Belgium	291A263	25	6	2003	Middens	2	4	13	3	2017			1		2		2		2		1	3	5	5	4	4	5	3	4	5	5	3	4	4	1	1	4	4	1			4	4	2	4
0	2	High	3	Belgium	291A262	2	8	2004	Middens	1	2	13	3	2017	1			salesman	2		2		5	Turkish	1	3	4	5	4	4	4	3	3	4	7	7	7	7	5	5	7	7	2	1	20	4	4	4	4
0	2	High	3	Belgium	291A261	18	1	2003	Middens	1	2	13	3	2017	3		2		2		5	The Neth	5	Turkish	1	1	2	1	3	5	4	5	7	1	6	5	6	5	6	6	5	6	3	5	0	1	1	6	5
0	2	High	3	Belgium	291A260	2	2	2003	Middens	2	4	13	3	2017					2		5	Turkey	5	Turkish	1	1	5	4	4	5	5	5	5	5	5	6	6	6	5	5	6	5	1	3	10	4	5	4	4
0	2	High	3	Belgium	291A259	28	3	2003	Middens	1	2	13	3	2017		construction worker		house wife	2		5	Turkey	5	Turkish	1	1	5	4	5	5	3	3	3	4	4	4	4	4	4	4	3	4	1	2	30	3	3	4	3
0	2	High	3	Belgium	291A258	21	7	2002	Middens	1	2	13	3	2017	3		2		2		5	Turkey	5	Turkish	1	1	5	7	6	5	4	5	4	5	6	6	5	5	5	5	7	7				4	4	5	4
0	2	High	3	Belgium	291A257	28	11	2003	Middens	2	4	13	3	2017			2		2		5	italy	2		1	3	5	5	3	4	5	7	5	4	5	7	5	5	7	5	5	4	1			2	4	5	5
0	2	High	3	Belgium	291A256	8	12	2003	Middens	1	2	13	3	2017					5	italy	5	Morrocco	5	Italian	4	1	5	5	5	4	3	3	3	5	5	5	5	5	4	4	4	4	3	6	0	5	3	5	3
0	2	High	3	Belgium	291A255	7	6	2002	Middens	2	4	13	3	2017		welder	1		2		5	Turkey	5	Kurdish	1	1	7	4	4	4	5	4	3	6	5	5	5	6	5	6	7	7	2	1	0	4	4	4	4
0	2	High	3	Belgium	291A254	15	4	2002	Middens	2	4	13	3	2017	1		3		5	Kosovo	5	Kosovo	5	Kosovaar	1	1	4	4	4	3	5	6	4	5	3	3	4	5	4	5	5	7	5	4	0	4	5	5	4
0	2	High	3	Belgium	291A253	3	2	2003	Middens	1	2	13	3	2017	3		1		2		5	Turkey	5	Turkish	1	3	4	7	7	4	4	1	1	7	7	4	6	7	4	5	1	2	2	2	30	4	3	5	2
0	2	High	3	Belgium	291A252	15	12	2003	Middens	2	4	13	3	2017			2		2		2		2		4	3	4	4	4	3	5	7	5	5	6	6	6	6	7	7	4	4	5	5	30	4	4	4	4
0	2	High	3	Belgium	291A251	2	9	2004	Middens	2	4	13	3	2017		bricklayer	3		2		5	Turkey	5	Turkish	1	1	7	6	4	3	7	7	7	7	7	7	7	7	4	4	7	7	5	3	30	4	7	7	4
0	2	High	3	Belgium	291A250	4	2	2002	Middens	2	4	13	3	2017		factory worker	3		2		5	Turkey	5	Turkish	1	3	7	5	4	4	5	4	5	5	4	4	5	4	5	5	5	5	3	1	0	4	3	4	3
0	2	High	3	Belgium	291A249	14	5	2004	Middens	1	2	13	3	2017					2		2		2		1	3	5	6	7	4	3	1	2	7	7	6	5	7	7	4	1	1	5	2	30	1	1	2	1
0	2	High	3	Belgium	291A248	20	8	2004	Middens	1	2	13	3	2017		factory worker		house wife	2		5	Turkey	5	Turkish	4	1	6	7	5	7	5	1	4	4	7	7	7	7	6	7	4	4	5	2	0	2	4	6	1
0	2	High	3	Belgium	291A247	2	2	2004	Middens	2	4	13	3	2017				chef	2		5	Spain	5	Spanish	1	3	4	1	7	4	4	7	1	7	7	7	4	7	4	7	1	1	1			2	4	6	4
0	2	High	3	Belgium	291A246	7	11	2003	Middens	1	2	13	3	2017		painter	4		2		5	italy	5	Italian	4	1	7	7	7	7	7	7	7	7	4	4	4	4	7	7	5	4	3	14	0	7	7	7	7
0	2	High	3	Belgium	291A245	2	10	2003	Middens	2	4	13	3	2017	3		3		2		2		5	Turkish	1	1	4	4	4	4	7	4	4	4	5	5	5	5	4	4	5	6	2	1	0	4	4	4
0	2	High	3	Belgium	291A244	20	11	2003	Middens	2	4	13	3	2017	1		1		5	Turkey	5	Turkey	5	Turkish	4	1	3	4	4	7	4	7	7	7	7	7	7	4	5	7	4	6	2	1	0	4	5	5	4
0	2	High	3	Belgium	291A243	12	6	2002	Middens	1	2	13	3	2017			1		2		5	Morrocco	2		1	1	5	7	7	3	5	3	4	3	5	5	5	5					3	5	5	4	5	5	3
0	2	High	3	Belgium	291A242	6	12	2004	Middens	1	2	13	3	2017		welder		cleaning	2		2		2		4	1	4	3	3	4	4	4	5	4	5	5	5	5	5	5	5	5	3	2	30	3	3	4	4
0	2	High	3	Belgium	291A241	28	12	2002	Middens	1	2	13	3	2017	1		1		2		5	italy	2		1	3	5	6	7	1	5	4	1	7	7	5	5	5	3	5	1	1	5	0	30	1	1	1	1
0	2	High	3	Belgium	291A240	12	4	2002	Middens	1	2	13	3	2017	3		4		2		5	Turkey	5	Turkish	1	3	5	1	7	1	6	5	5	5	7	6	7	7	4	4	7	7	2	1	0	5	4	3	3
0	2	High	3	Belgium	291A239	21	10	2004	Middens	2	4	13	3	2017		army		representor	2		2		2		1	1	4	1	3	4	5	4	4	4	6	4	4	3	4	5	4	4	3	4	0	3	3	3	4
0	2	High	3	Belgium	291A238	3	11	2003	Middens	2	4	13	3	2017	3		3		2		5	Ukraine	2		1	5	5	6	7	4	4	6	5	4	4	6	3	5	4	3	1	1	3	6	0	4	3	2	4
0	2	High	3	Belgium	291A237	5	4	2004	Middens	1	2	13	3	2017				waitress	2		5	Turkey	5	Turkish	1	4	4	5	5	4	6	4	4	5	7	4	5	5	4	5	7	7	1	4	0	3	5
0	2	High	3	Belgium	291A236	22	12	2001	Middens	2	4	13	3	2017	5		3		5	The Neth	5	Nigeria	5	English	1	1	6	6	5	5	5	4	3	5	4	3	4	4	4	5	5	5	2	1	0	4	4	4	3
0	2	High	3	Belgium	291A235	23	8	2003	Middens	1	2	13	3	2017	5		4		5	iraq	5	iraq	5	iraqees	1	4	6	7	4	5	6	5	7	3	7	5	4	6	6	5	7	7	3	10	30	6	5	5	6
0	2	High	3	Belgium	291A234	20	3	2004	Middens	1	2	13	3	2017	3		3		2		2		5	Turkish	1	1	5	7	6	5	5	5	5	7	6	4	5	4	4	3	6	5	3	15	0	4	4	3	3
0	2	High	3	Belgium	291A233	26	5	2004	Middens	1	2	13	3	2017	5			house mom	2		5	Turkey	5	Turkish	3	1	6	3	4	3	5	2	6	4	7	5	4	4	3	2	5	4	2	0	50	4	2	5	4
0	2	High	3	Belgium	291A232	18	3	2003	Middens	1	2	13	3	2017			2		2		5	Turkey	5	Turkish	1	3	4	1	4	2	5	1	2	4	7	4	5	7	4	3	4	5	3	5	30	1	4	3	4
0	2	High	3	Belgium	291A231	2	10	2001	Middens	1	2	13	3	2017	4		4		5	Spain	5	Spain	5	Spanish	1	1	7	5	3	4	4	4	4	4	4	5	5	4	3	3	1	1	2	5	0	3	5	3	4
0	2	High	3	Belgium	291A230	5	8	2003	Middens	1	2	13	3	2017		salesman		accountant	2		2		2		1	5	7	4	4	4	5	3	2	4	6	5	4	5	4	4	4	3	2	1	0	4	3	2	3
0	2	High	3	Belgium	291A229	9	8	2002	Middens	2	4	13	3	2017					5	italy	5	Morrocco	5	Italian	1	1	5	5	4	4	4	4	5	5	4	4	4	4	4	5	7	7	1				3	3	5
0	2	High	3	Belgium	291A228	6	10	2003	Middens	2	4	13	3	2017		representation	5		2		5	italy	2		1	3	4	5	5	4	6	4	4	5	5	3	4	4	4	4	3	3	4	6	30	5	4	4	5
0	2	High	3	Belgium	281D449	1	1	2003	SPC Leu	2	4	9	3	2017	5			pedagoge	2		2		2		1	5	5	4	4	3	5	5	3	5	7	4	3	1	4	4	2	3	2	3	30	3	4	1	2
0	2	High	3	Belgium	281D448	20	4	2003	SPC Leu	1	2	9	3	2017	5		5		2		2		2		1	3	5	4	5	2	5	4	3	4	7	6	6	6	5	5	1	1	5	14		4	4	4	3
0	2	High	3	Belgium	281D447	12	7	2003	SPC Leu	1	2	9	3	2017	5			attorney	2		5	Sweden	2		1	1	4	4	5	4	5	5	4	5	6	4	4	6	4	4	4	3	3	6		4	4	4	4
0	2	High	3	Belgium	281D446	26	6	2003	SPC Leu	2	4	9	3	2017	5		5		2		2		2		1	1	7	5	7	5	7	7	7	5	7	4	4	1	3	4	1	1	3	3	20	5	4	6	4
0	2	High	3	Belgium	281D445	3	11	2003	SPC Leu	1	2	9	3	2017	5		4		2		2		2		1	1	3	4	6	5	5	6	4	5	7	5	5	6	5	5	2	1	4	6		4	4	4	5
0	2	High	3	Belgium	281D444	5	11	2003	SPC Leu	2	4	9	3	2017	4		5		2		2		2		3	1	7	5	4	3	7	5	4	5	7	7	7	7	4	5	4	2	5	17		5	4	4	5
0	2	High	3	Belgium	281D443	17	3	2004	SPC Leu	1	2	9	3	2017		project manager kbc( bank)		assistant to pharmacist	2		2		2		1	3	7	6	4	4	6	6	6	6	7	5	5	4	7	7	5	5	5	5		5	6	4	7
0	2	High	3	Belgium	281D442	30	6	2004	SPC Leu	2	4	9	3	2017	5		5		2		2		2		1	1	7	5	4	1	6	4	3	5	7	5	6	3	6	7	5	4	4	7		5	3	4	5
0	2	High	3	Belgium	281D441	23	6	2004	SPC Leu	1	2	9	3	2017		works in bank		representator	2		2		2		1	1	7	5	5	4	5	4	4	5	6	5	4	5	5	5	4	4	3	7		4	3	3	3
0	2	High	3	Belgium	281D440	24	3	2004	SPC Leu	1	2	9	3	2017	5		5		2		2		2		1	1	5	3	2	1	6	4	3	4	6	4	6	5	5	5	4	1	2	3		5	3	1	3
0	2	High	3	Belgium	281D439	1	10	2004	SPC Leu	1	2	9	3	2017	5		5		2		2		2		1	1	3	5	6	4	4	4	2	5	7	5	4	5	7	7	1	1	3	5		4	3	2	2
0	2	High	3	Belgium	281D438	3	10	2004	SPC Leu	2	4	9	3	2017	3		5		2		2		2		4	1	7	4	6	5	6	5	4	5	7	4	4	6	6	6	4	3	2	2	30	4	3	3	3
0	2	High	3	Belgium	281D437	3	4	2004	SPC Leu	1	2	9	3	2017	5			logistics in hospital	2		5	brazil	2		1	1	7	5	7	5	6	4	3	7	2	4	5	7	3	2	6	5	3	6		7	6	5	4
0	2	High	3	Belgium	281D436	30	5	2004	SPC Leu	1	2	9	3	2017	5		5		2		5	Ierland	2		1	1	7	5	4	3	6	6	5	7	7	5	7	7	7	7	4	4	4	8		6	6	4	7
0	2	High	3	Belgium	281D435	10	9	2004	SPC Leu	1	2	9	3	2017	5		5		2		2		2		1	1	7	4	5	1	5	4	6	6	7	7	7	7	6	7	5	4	1			7	4	5	3
0	2	High	3	Belgium	281D434	22	7	2004	SPC Leu	1	2	9	3	2017					2		2														6	4	5	4	5	5	5	4	3	5	30	4	3	3	4
0	2	High	3	Belgium	281D433	7	6	2004	SPC Leu	2	4	9	3	2017		communication assistant	5		2		5	The Neth	2		1	5	5	6	4	4	6	6	3	4	5	4	4	4	6	6	1	1	4	7		4	5	4	5
0	2	High	3	Belgium	281D432		11	2003	SPC Leu	1	2	9	3	2017
0	2	High	3	Belgium	281D431	20	2	2003	SPC Leu	1	2	9	3	2017		investment			2		5	Iran	2		1	1	4	5	6	5	4	3	3	3	6	4	4	5	5	5	1	1	3	5		4	4	4	4
0	2	High	3	Belgium	281D430	10	10	2004	SPC Leu	2	4	9	3	2017	5		5		2		5	The Neth	2		1	5	6	6	5	4	5	6	5	5	7	5	6	6	6	5	2	1	4	8		5	4	4
0	2	High	3	Belgium	281D429	9	12	2004	SPC Leu	2	4	9	3	2017	5		5		2		2		2		4	1	3	1	4	4	5	4	4	5	5	4	4	6	5	4	2	1	1			2	4	3	3
0	2	High	3	Belgium	281D428	14	2	2004	SPC Leu	2	4	9	3	2017	2		3		2		5	Turkey	5	Turkish	1	1	7	4	5	4	6	6	5	5	7	7	6	7	4	4	4	2	3	3	30	5	4	4	4
0	2	High	3	Belgium	281D427	30	1	2004	SPC Leu	2	4	9	3	2017	5		5		2		5	Spain	5	Spanish	1	3	6	5	3	6	6	3	3	5	5	4	3	4	4	4	5	4	3	6	30	4	4	3	4
0	2	High	3	Belgium	281D426	18	10	2004	SPC Leu	2	4	9	3	2017		salesman		teaching students at university	5	Spain	5	Spain	2		1	5	4	3	4	3	6	1	2	2	6	5	6	5	5	5	5	5	2	3		3	3	2	4
0	2	High	3	Belgium	281D425	19	3	2004	SPC Leu	2	4	9	3	2017		coordinator		teacher at school for disabled	2		2		2		4	5	5	4	4	3	6	6	4	5	7	2	4	5	5	5	1	2	3	2		4	3	4	5
0	2	High	3	Belgium	281D424	26	9	2004	SPC Leu	2	4	9	3	2017					2		2		2		1	3	4	1	3		6	4		6	6	7	5	6	7	7	3	3	1			5	6	6	6
0	2	High	3	Belgium	281D423	5	9	2004	SPC Leu	2	4	9	3	2017	5		5		2		2		2		4	3	6	4	4	3	6	4	6	6	7	2	4	6	6	5	2	2	3	8	30	4	3	3	3
0	2	High	3	Belgium	281D422	30	11	2004	SPC Leu	2	4	9	3	2017	5		5		2		2		2		1	1	4	5	4	2	6	4	5	4	6	5	6	6	5	5	4	1	3	5	30	4	4	5	3
0	2	High	3	Belgium	281D421	13	12	2004	SPC Leu	1	2	9	3	2017	5		5		2		5	america.	2		1	1	6	5	4	6	3	2	1	4	5	4	3	6	7	6	1	1	4	5	30	5	6	5	6
0	2	High	3	Belgium	281D095	25	1	2004	Sint-Pi	1	2	9	3	2017	5		5		2		2		2		4	1	5	5	4	3	4	5	5	5	7	6	6	6	5	5	5	5	2	5	0	5	4	3	4
0	2	High	3	Belgium	281D094	14	6	2004	Sint-Pi	2	4	9	3	2017	5		4		2		2		2		4	3	5	4	3	3	5	5	5	5	6	6	6	6	5	5	5	4	3	1	0	5	3	3	4
0	2	High	3	Belgium	281D093	12	3	2004	Sint-Pi	2	4	9	3	2017	4		5		2		2		2		1	1	7	5	4	2	5	5	5	6	6	4	6	7	6	7	6	6	5	6	30	6	5	6	5
0	2	High	3	Belgium	281D092	23	9	2005	Sint-Pi	2	4	9	3	2017	5			own boss	2		2		2		1	1	5	4	4	4	7	6	5	5	7	6	5	5	7	6	2	1	3			6	3	3	5
0	2	High	3	Belgium	281D091	7	6	2004	Sint-Pi	2	4	9	3	2017	5		5		2		2		2		1	1	7	5	5	4	6	6	3	5	7	6	5	6	6	6	6	5	4	0	50	4	3	3	3
0	2	High	3	Belgium	281D090	2	2	2004	Sint-Pi	1	2	9	3	2017		ceo		attorney	2		2		2		1	1	7	7	5	1	6	4	5	6	5	5	5	5	5	5	4	1	1			4	5	4	3
0	2	High	3	Belgium	281D087	25	9	2003	Sint-Pi	2	4	9	3	2017	5		4		2		2		2		1	1	5	4	4	3	7	7	6	7	7	5	7	7	6	4	1	1	4	10	0	5	5	4	3
0	2	High	3	Belgium	281D086	4	11	2003	Sint-Pi	1	2	9	3	2017	5			teacher	2		2		2		1	1	5	5	4	3	6	5	5	5	7	6	6	6	6	6	2	2	5	9	45	5	6	4	6
0	2	High	3	Belgium	281D085	11	3	2004	Sint-Pi	2	4	9	3	2017		manager transport company		restaurant owner	2		2		2		1	1	7	7	6	6	7	7	3	3	5	1	3	3	5	3	1	1	4	6	0	3	3	5	3
0	2	High	3	Belgium	281D065	2	11	2003	Sint-Pi	1	2	9	3	2017	5	orthopedic chirurg	5	eye doctor	2		5	Dad in A	2		1	1	7	5	7	6	6	4	5	6	7	7	7	7	6	5	1	1	5	12	30	7	5	3	3
0	2	High	3	Belgium	281D064	25	7	2003	Sint-Pi	1	2	9	3	2017	4		3		2		5	Philipin	5	Fagalog	1	1	6	4	5	6	7	5	6	4	7	6	7	6	5	6	5	4	3	6	30	5	5	4	5
0	2	High	3	Belgium	281D063	7	2	2003	Sint-Pi	2	4	9	3	2017		attorney		nurse	2		2		2		1	5	5	4	4	4	5	4	5	5	5	5	5	4	4	5	4	4	5	15	0	4	4	3	3
0	2	High	3	Belgium	281D062	14	3	2003	Sint-Pi	1	2	9	3	2017	5		4		2		2		2		1	1	6	5	5	3	4	2	4	3	7	5	6	3	5	5	1	1	3	5	30	3	3	2	3
0	2	High	3	Belgium	281D061	9	12	2003	Sint-Pi	1	2	9	3	2017	4		5		2		2		2		1	1	5	6	5	4	5	6	4	6	7	4	4	4	5	5	1	1	3	4	0	4	3	3	4
0	2	High	3	Belgium	281D045	10	2	2003	Sint-Pi	1	2	9	3	2017		manager		kindergarten teacher	2		2		2		1	1	7	6	6	4	5	6	5	7	6	7	7	7	5	5	2	1	2	2	0	4	6	5	5
0	2	High	3	Belgium	281D044	6	10	2003	Sint-Pi	2	4	9	3	2017		engineer	5		2		2		2		1	1	5	7	5	4	5	5	3	5	7	3	5	5	3	3	5	5	2	1	45	3	3	3	4
0	2	High	3	Belgium	281D043	31	7	2003	Sint-Pi	2	4	9	3	2017		no employment	4		2		2		2		1	3	4	4	4	4	5	5	5	5	5	4	4	4	4	4	3	4	5	4	0	5	5	4	3
0	2	High	3	Belgium	281D042	5	6	2003	Sint-Pi	2	4	9	3	2017			5		2		2		2		1	4	7	4	6	6	4	5	3	6	7	2	2	4	6	6	3	4	4	7	0	5	6	4	6
0	2	High	3	Belgium	271B336	27	6	2003	Coloma	2	4	6	3	2017	1		3		2		2														6	4	3	5	5	4	2	1	2	2		4	3	2	3
0	2	High	3	Belgium	271B335	10	6	2002	Coloma	2	4	6	3	2017		director/manager	4		2		2		2		1	1	5	4	4	3	5	5	4	5	7	5	5	6	5	5	4	4	2	3		4	5	4	4
0	2	High	3	Belgium	271B319	14	8	2002	Coloma	2	4	6	3	2017		construction worker		nurse	2		2		2		1	1	5	1	3	4	6	7	3	5	6	7	4	6	5	5	2	2	3	2		3	5	4	3
0	2	High	3	Belgium	271B318	6	2	2003	Coloma	2	4	6	3	2017		school coordinator		teacher	2		2		2		1	1	7	1	5	4	6	4	6	4	4	3	4	3	6	5	5	4	5	5		4	5	3	3
0	2	High	3	Belgium	271B317	25	11	2003	Coloma	2	4	6	3	2017		army	4		2		2		2		1	3	4	6	7	6	5	4	1	3	1	1	1	1	5	5	1	1	2	2		6	6	6	5
0	2	High	3	Belgium	271B316	27	2	2003	Coloma	1	2	6	3	2017		truck driver		house wife	2		2		2		1	3	4	5	5	4	4	4	4	4	5	4	5	5	6	5	2	2	5	6		4	5	3	4
0	2	High	3	Belgium	271B315	30	9	2003	Coloma	1	2	6	3	2017		butcher		butcher but also diploma chef	2		5	Hungary	2		1	1	5	3	5	4	6	5	4	6	7	5	5	5	6	6	4	2	2	4	50	5	3	1	3
0	2	High	3	Belgium	271B314	26	3	2002	Coloma	1	2	6	3	2017				no job	2		2		2		4	1	1	2	1	1	4	4	4	3	5	5	5	5	5	4	5	3	2	1	30	3	3	4	3
0	2	High	3	Belgium	271B313	6	4	2003	Coloma	2	4	6	3	2017					2		2		2		1	3	4	4	6	6	6	4	5	6	6	4	5	6	6	5	2	1	4	8	30	5	4	3	2
0	2	High	3	Belgium	271B312	14	4	2003	Coloma	2	4	6	3	2017			4		5	south-af	5	south-af	5	English	1	1	5	4	4	4	5	5	4	6	5	4	3	3	5	3	1	1	1			3	3	4	4
0	2	High	3	Belgium	271B311	8	3	2003	Coloma	2	4	6	3	2017		life safer		accountant	2		5	The Neth	2		1	1	5	5	3		6	6	6	7	7	6	6	7	5	5			5	7		5	4	4	1
0	2	High	3	Belgium	271B291		9	2003	Coloma	2	4	6	3	2017		factory worker	2		2		2		2		2	5	5	4	4	3	5	4	4	4	3	3	4	4	5	5	3	2	3	5		4	3	3	3
0	2	High	3	Belgium	271B290				Coloma			6	3	2017									5	Guinees	1	1	6	4	4	3	6	4	5	6	7	4	6	5	6	7	7	7	1			5	3	3	3
0	2	High	3	Belgium	271B289	2	6	2003	Coloma	1	2	6	3	2017					5	germany	5	Turkey	5	Kurdish	1	1	6	5	7	6	3	2	1	4	6	7	7	7	5	5	5	5	2	3	30	5	3	4	4
0	2	High	3	Belgium	271B288	27	3	2003	Coloma	2	4	6	3	2017	3		3		2		2		2		3	3	4	4	4	5	5	2	6	4	7	3	6	7	4	4	4	5	2	2		4	4	5	3
0	2	High	3	Belgium	271B287	14	5	2003	Coloma	2	4	6	3	2017		computer manager	4		2		5	south-ko	2		1	3	6	5	6	5	6	6	6	6	4	4	4	4	3	3	3	3	2	2	30	5	5	4	4
0	2	High	3	Belgium	271B286	15	4	2002	Coloma	2	4	6	3	2017	1		1		2		2		2		1	3	7	7	5	3	7	7	7	7	7	6	5	7	7	4	4	2	1	2		5	4	4	4
0	2	High	3	Belgium	271B285	4	6	2002	Coloma	2	4	6	3	2017		army		nurse	2		5	germany	2		3	3	7	5	7	4	6	4	4	6	5	2	2	4	6	6	1	1	5	0	30	7	7	7	7
0	2	High	3	Belgium	271B284	30	10	2002	Coloma	2	4	6	3	2017		truck driver		ironer	2		2		2		1	5	5	5	4	3	5	4	4	4	4	1	1	4	3	3	1	1	3	4	30	4	5	5	4
0	2	High	3	Belgium	271A498	12	9	2003	COLOMA	2	4	6	3	2017		welder	5		2		5	Morrocco	5	French A	1	1	7	7	7	4	7	7	3	6	7	7	6	7	6	7	7	7	4	16	35	5	5	6	5
0	2	High	3	Belgium	271A497	20	3	2004	COLOMA	2	4	6	3	2017		worker		ikea	5	ETHIOPIE	2		5	ETHIOPEN	1	1	7	5	6	4	6	7	6	5	5	7	7	4	5	7	1	1	3	9	30	7	5	5	5
0	2	High	3	Belgium	271A496	12	9	2004	COLOMA	1	2	6	3	2017					2		5	ALBANIE	2		1	3	5	4	3	1	7	4	6	7	5	4	6	7	6	6	4	1	5	1	0	4	4	4	2
0	2	High	3	Belgium	271A495	20	4	2004	COLOMA	2	4	6	3	2017					2		2		2		1	3	7	4	4	5	7	6	6	7	7	2	3	7	7	7	6	6	1	1	0	5	3	3	5
0	2	High	3	Belgium	271A494	25	9	2002	COLOMA	2	4	6	3	2017		hair dresser		own boss	2		2		2		1	3	6	6	5	5	6	6	6	5	7	7	7	6	6	6	3	3	3	5	0	5	5	5	5
0	2	High	3	Belgium	271A493	27	10	2003	COLOMA	2	4	16	3	2017					2		2		2		1	3	5	4	4	4	7	5	4	5	7	7	5	4	6	5	4	3	2	1	5	4	4	4	3
0	2	High	3	Belgium	271A492	16	12	2003	COLOMA	2	4			2017		own boss		own boss	2		5	Turkey	5	Assyrian	1	1	7	7	7	4	7	7	7	7	4	1	4	1	6	6			1			4	7	7	7
0	2	High	3	Belgium	271A491	9	11	2003	COLOMA	2	4	9	11	2017		accountant		nurse	2		2		2		1	1	6	7	4	4	6	6	7	6	7	5	6	6	5	5	4	4	5	8		7	7	7	7
0	2	High	3	Belgium	271A490	14	8	2002	COLOMA	1	2	6	3	2017		works at docks		nurse	2		2		2		1	3	4	3	4	4	6	4	5	5	5	4	5	5	5	5	3	3	3	5		4	4	4	3
0	2	High	3	Belgium	271A489	4	10	2004	COLOMA	2	4	6	3	2017				chef	2		5	France	2		1	5	5	3	3	4	3	3	3	4	6	5	7	6	1	4			1
0	2	High	3	Belgium	271A488	7	11	2003	COLOMA	1	2	6	3	2017		butcher			2		5	Australi	2		1	4	7	6	5	4	7	1	1	7	7	1	1	3	3	5	1	1	1	0	0	7	4	4	4
0	2	High	3	Belgium	271A487	17	7	2003	COLOMA	1	2	6	3	2017					5	ROEMENIE	5	ROEMENIE	5	Roumania	1	3	6	5	7	6	7	7	6	5	7	4	4	6	5	6	7	6	1			6	7	5	4
0	2	High	3	Belgium	271A486	14	12	2004	COLOMA	2	4	6	3	2017		hotel manager	4		2		2		2		1	3	4	4	5	4	6	6	5	6	6	6	7	6	6	6	1	1	2	6	30	5	5	6	6
0	2	High	3	Belgium	271A485	10	12	2003	COLOMA	2	4	6	3	2017	5				5	ANGOLA	5	CONGO AN	5	French P	1	2	5	4	4	3	5	5	3	4	5	5	5	4	5	5	5	5	1			4	5	5	5
0	2	High	3	Belgium	271A484	6	8	2004	COLOMA	2	4	6	3	2017	2		2		5	poland	5	poland	5	Polish	1	1	7	4	2	3	4	5	3	6	2	1	1	1	2	5	5	4	3	3	30	3	5	4	1
0	2	High	3	Belgium	271A483	31	10	2003	COLOMA	2	4	6	3	2017					2		2		2		1	1	5	4	4	4	5	4	4	4	5	5	5	4	6	5	4	4	3	6		4	4	4	4
0	2	High	3	Belgium	271A482	1	3	2003	COLOMA	2	4	6	3	2017		French teacher		cleaning	5	The Neth	5	SENEGAL	5	POULA	1	1	4	5	4	5	7	7	4	7	7	7	7	7	7	7	4	4	3	4		3	4	5	3
0	2	High	3	Belgium	271A481	11	2	2004	COLOMA	2	4	6	3	2017					2		2		2		1	3	4	1	4	4	7	7	5	6	7	7	5	5	6	4			2	3	0	4	4	4	1
0	2	High	3	Belgium	271A480	29	6	2003	COLOMA	2	4	6	3	2017			1		2		5	Morrocco	5	Arabic	1	1	5	1	5	5	5	4	4	5	5	5	5	5	4	4	3	3	2	2	0	4	3	4	3
0	2	High	3	Belgium	271A479	5	12	2003	COLOMA	1	2	6	3	2017		construction worker			2		5	germany	2		1	3	7	4	3	5	7	4	5	5	7	4	5	7	3	5	5	5	3	4		4	4	7	2
0	2	High	3	Belgium	271A478	19	6	2003	COLOMA	2	4	6	3	2017		newspaper store	4	child nurse	2		2		2		4	1	3	4	3	3	4	5	4	4	5	4	5	5	5	5	4	4	3	2	0	4	4	4	4
0	2	High	3	Belgium	271A477	25	7	2003	COLOMA	2	4	6	4	2017				child care	2		2		2		4	1														3
0	2	High	3	Belgium	271A476	5	2	2003	COLOMA	2	4	6	3	2017					5	Spain	5	Morrocco	5	Arabic	4	1	4	1	4	5	5	1	3	5	4	7	7	7	5	5	4	4	1			4	5	7	4
0	2	High	3	Belgium	271A475	2	12	2004	COLOMA	2	4	6	3	2017		driver	3		2		2		2		1	3	4	3	4	5	5	5	5	7	5	4	4	5	6	5	4	4	2	1	15	4	3	4	5
0	2	High	3	Belgium	271A474	2	6	2004	COLOMA	2	4	6	3	2017	4			cleaning	2		2		2		4	5	4	4	4	5	5	6	4	7	5	7	7	5	4	4	6	6	2	2	0	4	5	4	4
0	2	High	3	Belgium	271A473	26	12	2002	COLOMA	2	4	6	3	2017	5		4		5	ARMENIE	5	ARMENIE	5	Armanian	1	1	4	4	4	4	5	5	5	4	5	4	4	3	5	5	5	4	2	4	0	4	4	4	4
0	2	High	3	Belgium	271A472	17	6	2003	COLOMA	2	4	6	3	2017		driver	1		2		5	Turkey	5	Assyrian	1	1	5	4	3	4	7	7	7	7	4	1	4	2	5	5	4	4	1			4	4	5	5
0	2	High	3	Belgium	271A471	6	11	2003	COLOMA	1	2	6	3	2017		driver of cargo at airport	3		2		2		2		1	1	6	1	1	5	5	1	6	7	5	5	5	7	7	6	5	5	1			5	3	3	5
0	2	High	3	Belgium	271A470	4	6	2003	COLOMA	1	2	6	3	2017	3		4		2		2		5	French	1	5	7	6	5	1	7	5	4	5	7	7	7	7	5	5	1	1	2	3	0
0	2	High	3	Belgium	271A469	17	11	2004	COLOMA	1	2	6	3	2017	3		3		2		2		2		1	1	4	4	3	4	4	5	4	3	7	5	5	7	4	4	4	4	2	2		3	3	3
0	2	High	3	Belgium	271A468	6	12	2004	COLOMA	1	2	6	3	2017		nmbs (railway)			2		2				1	1	1	7	3		4	3	3	5	7	7	6	5	7	7	7	4	5	3	0	4	4	3	3
0	2	High	3	Belgium	271A467	26	8	2003	COLOMA	1	2	6	2	2017	3		4		2		2		2		1	1	4	4	4	4	5	3	5	5
0	2	High	3	Belgium	271A466	31	1	2004	COLOMA	1	2	6	3	2017					2		2		2		1	3	5	5	7	4	4	4	4	4	7	4	6	7	6	6	1	1	5	1	45	6	6		6
0	2	High	3	Belgium	262B217	27	12	2003	Montfor	2	4	23	2	2017	5		3		2		5	Spain	5	Spanish/	1	1	6	6	5	4	6	7	4	5	7	4	3	4	5	5	1	1	3	3	30	5	5	4	4
0	2	High	3	Belgium	262B216	5	3	2003	Montfor	1	2	23	2	2017	4		3		2		2		2		1	4	7	4	6	6	3	2	4	6	7	2	4	7	4	4	4	5	5	14	0	7	7	7	6
0	2	High	3	Belgium	262B215	10	1	2003	Montfor	1	2	23	2	2017		died			2		2		2		1	4	5	4	4	3	4	2	2	5	7	5	5	7	5	5	4	1	1			2	2	2	2
0	2	High	3	Belgium	262B214	20	4	2004	Montfor	1	2	23	2	2017		airtraffic		counselor at KU Leuven	2		2		2		4	1	4	4	4	5	6	5	5	6	6	7	6	6	6	6	4	4	4	8	30	4	5	4	4
0	2	High	3	Belgium	262B213	28	8	2004	Montfor	2	4	23	2	2017	5		5		2		2		2		1	1	4	2	2	2	6	5	4	5	7	5	5	6	5	5	6	6	3	3	30	4	5	5	5
0	2	High	3	Belgium	262B212	30	5	2003	Montfor	2	4	23	2	2017	5		3		2		5	France	2		1	1	6	6	5	4	5	6	6	4	6	4	6	5	5	4	1	2	2	2	0	5	4	3	4
0	2	High	3	Belgium	262B211	23	9	2004	Montfor	1	2	23	2	2017	5		5		2		2		2		1	1	6	4	2	1	5	3	4	3	7	5	6	7	7	6	2	1	3	7	30	4	5	3	5
0	2	High	3	Belgium	262B210	15	7	2004	Montfor	2	4	23	2	2017	5			works in city hall	2		2		2		1	1	4	2	2	2	6	6	6	6	6	7	7	7	6	6	4	5	1			5	5	4	4
0	2	High	3	Belgium	262B209	11	2	2003	Montfor	2	4	23	2	2017	5		5		2		2		2		1	1	7	6	5	6	6	5	5	4	7	5	6	5	7	6	5	4	3	10	0	6	5	3	4
0	2	High	3	Belgium	262B208	2	6	2003	Montfor	2	4	23	2	2017	5		5		2		2		2		2	5	7	5	6	3	4	4	3	7	1	1	3	5	7	7	6	6	5	8	0	7	4	5	5
0	2	High	3	Belgium	262B207	1	9	2004	Montfor	1	2	23	2	2017			4		2		2		2		1	5	4		5	4	5	4	4	5	7	3	3	4	4	4	1	1	3	4	30	4	3	3	3
0	2	High	3	Belgium	262B206	20	5	2004	Montfor	2	4	23	2	2017	5		5		2		2		2		1	1	7	4	3	1	6	6	7	6	7	6	7	7	5	6	4	3	4	5	0	3	5	3	3
0	2	High	3	Belgium	262B205	9	12	2004	Montfor	1	2	22	2	2017					2		5	Poland	2		1	1	4	4	5	4	5	5	5	5	6	4	6	4	6	6	4	4	5			4	5	2	2
0	2	High	3	Belgium	262B204	31	3	2004	Montfor	1	2	23	2	2017		chef	5		2		5	Spain	2		1	3	7	7	1	4	7	7	1	7	7	7	1	7	6	6	1	1	3	5	10	6	1	1	7
0	2	High	3	Belgium	262B203	1	11	2004	Montfor	1	2	23	2	2017	5			nurse of people with disabilities	2		2		2		1	1	5	4	1	4	5	4	3	5	7	6	4	6	7	6	1	3	3	5	30	4	5	4	4
0	2	High	3	Belgium	262B202	14	12	2004	Montfor	1	2	23	2	2017	5		4		2		2		2		1	3	4	5	5	3	4	4	5	4	6	6	6	6	6	6	3	3	3	4	30	5	4	3	4
0	2	High	3	Belgium	262B201	10	11	2004	Montfor	2	4	23	2	2017		judge and professor		something with insurances	2		2		2		4	1	7	6	6	6	4	1	1	6	5	1	1	7	4	2	5	4	3	4	30	5	4	5	4
0	2	High	3	Belgium	262B200	1	4	2003	Montfor	1	2	23	2	2017		production manager	4		2		2		2		1	1	6	7	7	6	5	5	4	4	7	4	6	6	5	6	5	4	4	15	30	6	4	4	1
0	2	High	3	Belgium	262B199	18	12	2003	Montfor	1	2	23	2	2017	4		5		2		2		2		1	1	7	7	5	5	6	4	3	3	7	7	2	5	7	7	1	1	5	10	0	7	7	5	7
0	2	High	3	Belgium	262B198	17	10	2003	Montfor	2	4	23	2	2017	3		3		2		5	China	5	Chinese/	1	1	5	2	3	1	7	6	4	6	6	6	6	4	6	5	7	6	2	1	30	3	3	2	2
0	2	High	3	Belgium	262B197	16	4	2004	Montfor	1	2	23	2	2017	5		5		2		2		2		4	1	2	2	3	3	2	5	6	6	7	6	6	6	5	5	3	2	3	4	0	4	3	3	3
0	2	High	3	Belgium	262B196	26	9	2004	Montfor	1	2			2017				student	2		2		2		1	5	4	5	5	6	5	4	5	6	6	7	7	6	5	4	3	1	4	6	0	5	4	5	5
0	2	High	3	Belgium	262B195	23	9	2004		1	2			2017	4		4		2		2		2		1	1	6	4	6	4	6	5	6	5	7	6	7	7	5	5	1	1	4			5	4	1	3
0	2	High	3	Belgium	262B194	13	1	2004	Montfor	2	4	23	2	2017				kinesist	2		2		2		1	1	4	4	4	4	5	4	5	4	6	4	5	7	6	6	4	2	5	10	0	4	4	5	4
0	2	High	3	Belgium	262B193	15	9	2004	Montfor	1	2	23	2	2017	5		5		2		5	The Neth	2		1	3	4	1	4	4	5	4	3	5	5	6	5	5	5	5	1	1	2	1	0	4	3	2
0	2	High	3	Belgium	262B192	16	2	2004	Montfor	1	2	23	2	2017		laborant		works for Flemish government	2		5	Mom was	2		1	1	4	4	4	3	4	5	4	4	5	5	5	5	5	5	2	1	5	6	40	4	4	4	5
0	2	High	3	Belgium	262B191	28	7	2004	Montfor	2	4	23	2	2017					2		5	Ukraine	5	Russich/	1	1	7	4	3	4	7	7	7	7	3	3	5	3	4	5	1	1	2	1	0	3	1	1	1
0	2	High	3	Belgium	262B190	18	2	2004	Montfor	2	4	23	2	2017					2		2		2		1	1	5	5	5	6	6	5	4	6	5	4	4	4	5	5	5	4	3	3	30	5	5	4	4
0	2	High	3	Belgium	262B189	29	3	2004	Montfor	2	4	23	2	2017	4		4		2		2		2		1	1	5	4	4	4	7	5	4	6	7	4	4	5	4	5	3	3	3	3	0	4	3	3	4
0	2	High	3	Belgium	262B188	3	4	2004	Montfor	2	4	23	2	2017	5		4		2		2		2		4	3	6	4	3	3	5	4	4	5	7	6	6	6	6	6	4	4	1			5	5	4	4
0	2	High	3	Belgium	262B187	25	7	2003	Montfor	1	2	23	2	2017	4		4		2		2		2		1	5	7	6	6	6	4	5	6	5	6	5	6	6	5	5	2	2	2	4	30	5	5	5	4
0	2	High	3	Belgium	262B186	20	2	2003	Montfor	1	2	23	2	2017	4		4		2		2		2		1	1	7	6	5	4	4	5	6	6	6	5	6	6	5	5	2	2	2	1	0	5	5	6	5
0	2	High	3	Belgium	262B185	13	5	2003	Montfor	2	4	23	2	2017	3		5		2		5	Spain	2		1		5	6	6	5	7	7	4	6	7	5	5	7	7	7	2	1	5	10	0	4	6	7	4
0	2	High	3	Belgium	262B184	10	8	2003	Montfor	1	2	23	2	2017				painter	2		5	Spain	2		1	1	7	5	7	5	5	5	5	6	6	5	6	5	4	4	5	5	3	1	30	5	3	6	6
0	2	High	3	Belgium	262B183	31	8	2003	Montfor	1	2	23	2	2017				nurse of people with disabilities	2		2		2		1	1	5	5	5	5	6	5	4	6	7	6	5	6	7	1	4	5	4	6	30	6	7	6	6
0	2	High	3	Belgium	262B173	2	3	2002	Montfor	1	2	23	2	2017		travel agent	4		5	Russia	5	Russia	5	Russian	1	3	6	6	6	5	5	4	6	5	7	5	6	5	4	5	3	3	3	4	50	5	4	4	5
0	2	High	3	Belgium	262B172	14	7	2003	Montfor	1	2	23	2	2017	4		4		2		2		2		1	5	6	4	7	4	5	5	5	5	7	6	6	7	5	4	1	1	3	2	30	4	5	3	4
0	2	High	3	Belgium	262B171	3	8	2004	Montfor	2	4	23	2	2017	5		5		2		2		2		1	1	6	6	6	4	7	7	7	7	6	6	7	7	7	6	5	4	5	10	30	5	4	4	4
0	2	High	3	Belgium	262B170	23	7	2003	Montfor	1	2	23	2	2017	5			pharmacist	2		2		2		1	1	7	6	4	4	4	5	5	5	6	5	5	5	5	5	1	1	4	3	0	5	5	5	5
0	2	High	3	Belgium	262B169	8	12	2003	Montfor	1	2	23	2	2017		singer			2		2		2		1	1	7	7	7	6	6	4	4	6	6	5	4	6	4	3	3	4	2	2	0	5	3	5	3
0	2	High	3	Belgium	262B168	27	12	2003	Montfor	2	4	23	2	2017		engineer	4		2		5	Spain	2		4	1	7	5	4	6	4	6	5	6	7	7	6	7	5	5	1	2	4	4	0	6	5	7	6
0	2	High	3	Belgium	262B167	5	7	2003	Montfor	2	4	23	2	2017	4		4		2		2		2		4	1	7	7	5	6	7	7	5	6	5	6	6	5	5	6	4	4	5	6	30	5	4	4	3
0	2	High	3	Belgium	262B166	16	12	2003	Montfor	1	2	23	2	2017	5		5		2		2		2		1	1	7	7	7	4	3	7	4	5	7	7	7	7	7	7	3	1	5	10	0	4	1	3	5
0	2	High	3	Belgium	262B165	7	8	2003	Montfor	1	2	23	2	2017	5		4		2		2		2		1	1	4	3	5	4	3	3	5	5	5	4	5	4	5	5	1	1	3	7	0	3	4	4	3
0	2	High	3	Belgium	262B164	13	8	2003	Montfor	2	4	23	2	2017	5		4		2		2		2		1	5	6	4	4	3	6	6	6	6	5	3	3	4	4	5	1	1	3	6	0	4	4	3	3
0	2	High	3	Belgium	262B163	22	5	2003	Montfor	1	2	23	2	2017		baby sitter			2		2		2		1	1	5	6	4	4	5	6	6	7	5	6	6	6	5	5	3	2	3	6	30	4	4	5	4
0	2	High	3	Belgium	262B162	21	1	2003	Montfor	1	2	23	2	2017	5		5		2		5	The Neth	2		1	3	6	3	4	3	7	5	4	5	7	5	5	7	7	7	1	1	3	4	0	6	7	6	7
0	2	High	3	Belgium	262B161	28	11	2003	Montfor	2	4	23	2	2017	5		5		2		2		2		1	1	6	6	6	5	5	6	5	5	6	6	6	6	6	6	3	2	3	4	30	4	4	3	3
0	2	High	3	Belgium	262B160	31	8	2003	Montfor	1	2	23	2	2017	5		5		2		2		2		1	1	5	3	3	4	6	5	6	4	7	6	5	7	5	6	3	1	2	3	0	6	6	4	7
0	2	High	3	Belgium	262B159	25	3		Montfor	2	4	23	2	2017					2		2		2		1	1	6	4	4	3	7	7	5	6	7	5	5	6	6	4	1	1	2	3	30	7	5	4	4
0	2	High	3	Belgium	262B158	4	8	2003	Montfor	1	2	23	2	2017	5		5		2		2		2		1	1	7	6	6	6	4	5	3	5	7	2	5	7	7	7	5	2	3	5	15	5	5	4	6
0	2	High	3	Belgium	262B157	9	4	2003	Montfor	1	2	23	2	2017	5		3		2		2		2		1	5	6	4	5	3	5	3	3	5	6	6	3	6	6	5	1	1	3	5	30	5	4	3	4
0	2	High	3	Belgium	262B156	5	7	2004	Montfor	1	2	23	2	2017	4		3		2		2		2		1	1	5	5	3	4	5	6	6	5	7	6	6	7	7	6	4	2	3	4	30	4	3	4
0	2	High	3	Belgium	262B155	7	9	2003	Montfor	2	4	22	2	2017				own boss	2		5	Poland	5	Polish	1	1	7	5	6	4	6	4	4	5	6	4	4	5	4	4	6	5	3	2	10	6	4	6	5
0	2	High	3	Belgium	262B154	20	10	2003	Montfor	2	4	23	2	2017		boss in store		teacher	2		5	France	5	Dutch/Fr	1	1	7	4	4	4	7	6	4	7	7	4	6	7	5	5	5	3	3	3	30	5	6	4	4
0	2	High	3	Belgium	262B153	12	11	2004	Montfor	1	2	23	2	2017		ict-coordinator			2		2		2		1	1	6	5	2	4	5	6	4	6	7	5	5	6	5	5	4	3	4	6	0	4	3	3	3
0	2	High	3	Belgium	262B152	27	3	2003	Montfor	2	4	23	2	2017	5		5		2		2		2		1	1	5	5	5	6	4	4	5	5	6	4	5	5	6	6	3	3	4	6	30	5	7	6	6
0	2	High	3	Belgium	262B151	5	8	2003	Montfor	2	4	23	2	2017	5		5		2		2		2		1	1	7	5	4	5	5	6	4	7	7	7	5	7	6	7	4	4	5	10	0	3	3	3	3
0	2	High	3	Belgium	262B150	14	12	2003	Montfor	1	2	23	2	2017	4		5		2		2		2		1	1	6	5	4	4	5	5	5	5	5	5	6	5	6	6	4	4	3	5	0	5	5	3	5
0	2	High	3	Belgium	262B149	1	7	2003	Montfor	2	4	23	2	2017	5		5		2		2		2		3	1	5	6	6	4	3	4	5	5	6	3	4	5	4	5	2	1	1			5	4	3	5
0	2	High	3	Belgium	262B147	8	6	2004	Montfor	1	2	23	2	2017	5		5		2		2		2		1	1	5	5	6	4	5	5	5	6	6	6	6	6	4	4	3	3	1			5	6	5	4
0	2	High	3	Belgium	262B146	28	7	2003	Montfor	1	2	23	2	2017	5		5		2		2		2		1	1	7	7	7	4	4	2	3	4	6	3	5	6	6	5	4	4	3	3	0	6	5	3	4
0	2	High	3	Belgium	262B145	19	7	2004	Montfor	1	2	23	2	2017	5		5		2		2		2		1	1	6	5	4	4	5	3	5	6	6	6	5	6	5	6	1	1	4	5	30	4	5	4	5
0	2	High	3	Belgium	262B144	14	12	2004	Montfor	2	4	23	2	2017	5		5		2		2		2		1	1	7	6	5	7	6	4	6	2	7	7	7	6	6	5	2	1	2	2	30	6	7	7	6
0	2	High	3	Belgium	262B143	13	6	2003	montfor	2	4	23	2	2017	4		4		2		2		2		1	1	5	6	5	4	6	5	7	6	5	4	3	4	5	6	2	1	3	4	0	4	6	3	3
0	2	High	3	Belgium	262B142	4	8	2003	Montfor	2	4	23	2	2017	5		5		2		2		2		1	1	6	6	6	5	7	4	5	6	7	7	6	5	6	5	6	4	2	1	0	6	6	5	6
0	2	High	3	Belgium	262B141	25	7	2003	Montfor	2	4	23	2	2017	5		4		2		2		2		1	3	5	6	6	5	5	5	5	5	6	7	6	7	5	5	4	4	2	2	0	5	5	4	3
0	2	High	3	Belgium	262B140	29	7	2002	Montfor	1	2	23	2	2017	5		4		2		2		2		1	1	5	6	5	3	4	4	3	5	4	3	3	3	2	3	1	1	5	8	30	6	4	5	3
0	2	High	3	Belgium	262B120	29	8	2004	MSK Kee	1	2	14	2	2017		police		police	2		2		2		1	1	3	6	6	4	5	3	4	4	5	4	4	5	6	6	2	1	1			4	4	4	4
0	2	High	3	Belgium	262B119	11	3	2003	MSK Kee	1	2	14	2	2017		transporter of matrasses	3		5	France	5	France a	5	French	1	5	6	2	4	4	6	5	4	4	7	5	6	6	7	6	1	1	4	8	30	4	1	5	4
0	2	High	3	Belgium	262B118	29	8	2003	Montfor	2	4	23	2	2017		furniture salesman	5		2		2		2		1	1	6	4	5	4	7	5	4	6	4	3	4	5	5	5	4	3	2	2	30	3	3	2	5
0	2	High	3	Belgium	262B117	2	7	2003	Montfor	2	4	23	2	2017		works in company that sells computers	4		2		2		2		1	1	5	4	5	3	7	5	4	5	7	6	5	5	7	7	4	3	3	5	30	5	7	3	7
0	2	High	3	Belgium	262B116	26	6	2003	Montfor	2	4	23	2	2017	5		5		2		2		2		1	1	7	5	5	4	5	5	4	5	7	7	7	6	6	6	6	5	3	4	0	5	6	4	6
0	2	High	3	Belgium	262B115	3	4	2003	Montfor	2	4	23	2	2017	4		5		2		2		2		1	1	6	4	6	4	6	6	4	5	6	6	5	5	5	6	2	2	3	4	30	5	3	1	3
0	2	High	3	Belgium	262B114	6	11	2002	Montfor	2	4	22	2	2017	5		4		5	Germany	5	Germany	5	German	4	3	5	6	3	5	5	3	2	6	7	6	4	7	6	6	2	3	5	7	0	7	7	7	1
0	2	High	3	Belgium	262B113	23	1	2003	Montfor	1	2	23	2	2017	5		5		2		2		2		1	1	7	5	5	6	7	6	5	7	7	6	7	7	5	6	1	1	4	8	30	4	5	3	4
0	2	High	3	Belgium	262B112	5	8	2003	Montfor	2	4	23	2	2017	5		5		2		2		2		1	1	5	4	2	3	4	5	6	6	7	5	6	5	6	6	1	1	2	1	0	5	6	3	7
0	2	High	3	Belgium	262B111	5	3	2003	Montfor	2	4	23	2	2017			5		2		2		2		1	5	6	4	5	3	6	4	5	3	6	7	5	6	3	3	4	2	5	7	0	4	6	4	1
0	2	High	3	Belgium	262B110	25	2	2003	Montfor	2	4	23	2	2017	5			works in bank	2		5	Poland	2		1	1	5	5	4	4	6	6	4	7	7	6	5	6	5	5	5	4	4	5	0	6	5	3	6
0	2	High	3	Belgium	262B109	13	5	2003	Montfor	1	2	23	2	2017	4		5		2		2		2		1	1	5	4	5	4	6	5	5	5	4	3	3	4	4	4	5	3	4	11	0	5	5	4	3
0	2	High	3	Belgium	262B108	22	10	2003	Montfor	1	2	23	2	2017	5		5		2		5	Germany	5	Dutch en	1	5	7	7	7	7	5	4	6	5	7	7	6	5	4	4	1	1	3	7	0	6	4	4	4
0	2	High	3	Belgium	262B107	2	4	2003	Montfor	2	4	23	2	2017		laborant		employee at bank	2		2		2		1	1	5	4	4	2	7	6	4	5	7	6	6	6	6	6	3	1	2	1	30	4	5	3	4
0	2	High	3	Belgium	262B106	24	5	2003	Montfor	2	4	23	2	2017	4		5		2		2		2		1	3	6	5	5	6	7	7	6	7	6	4	4	5	6	6	3	3	5	7	30	4	4	4	4
0	2	High	3	Belgium	262B105	21	5	2003	Montfor	1	2	23	2	2017	5		5		2		5	France	5	Dutch/ F	1	1	6	7	6	4	4	5	5	5	7	6	6	5	6	6	3	3	5	8	30	6	6	5	6
0	2	High	3	Belgium	262B104	8	8	2003	Montfor	1	2	23	2	2017	5		5		2		5	Congo	2		1	1	6	5	5	5	5	4	3	1	5	5	5	5	5	5	5	4	3	5	0	5	4	3	3
0	2	High	3	Belgium	262B103	24	5	2003	Montfor	2	4	23	2	2017	5		4		2		5	France	2		1	3	6	6	5	4	7	6	6	6	7	3	4	6	6	5	4	4	4	8	0	4	4	3	5
0	2	High	3	Belgium	262B102	13	3	2003	Montfor	2	4	23	2	2017	5		5		2		5	Italy	2		1	1	7	4	4	2	6	6	4	6	7	6	5	7	6	6	4	2	4	6	30	5	3	1	2
0	2	High	3	Belgium	262B101	31	10	2004	Montfor	2	4	23	2	2017	4		4		2		2		2		4	5	4	4	5	5	4	5	3	6	7	7	6	7	7	7	5	4	3	4	30	3	2	1	5
0	2	High	3	Belgium	262B100	23	2	2004	Montfor	2	4	23	2	2017	5		5		2		2		2		1	1	7	4	2	3	7	6	5	6	7	7	7	6	7	6	1	1	3	5	30	4	6	3	3
0	2	High	3	Belgium	262B099	1	9	2004	Montfor	2	4	23	2	2017	5		5		2		2		2		4	1	4	5	4	4	4	3	3	4	5	4	4	5	5	5	5	4	1			4	3	3	3
0	2	High	3	Belgium	262B098	27	6	2003	Montfor	1	2	23	2	2017	5		5		2		2		2		1	3	5	4	3	4	4	5	4	6	7	6	5	6	6	7	1	1	3	6	30	5	4	5	6
0	2	High	3	Belgium	262B097	12	11	2003	Montfor	2	4	23	2	2017	5		5		2		2		2		1	5	5	4	4	4	6	7	6	4	6	6	4	4	6	6	5	2	2	2	0	3	4	2	3
0	2	High	3	Belgium	262B096	8	7	2003	Montfor	1	2	23	2	2017		bio-engineer		bio engineer	2		2		2		1	1	6	5	5	4	4	5	5	4	6	3	4	5	5	4	4	4	3	5	0	6	4	6	4
0	2	High	3	Belgium	262B084	13	5	2003	Montfor	2	4	23	2	2017	5		5		2		2		2		1	1	6	3	2	4	5	2	4	5	7	4	6	6	6	6	4	2	2	3	30	5	5	4	3
0	2	High	3	Belgium	262B083	7	4	2005	Montfor	1	2	23	2	2017	5		5		2		5	Ukraine	2		1	1	5	5	4	5	4	4	5	4	6	5	5	4	4	4	1	1	5	8	30	4	5	3	3
0	2	High	3	Belgium	262B082	1	4	2003	Montfor	2	4	23	2	2017	5		5		2		2		2		1	1	5	6	5	4	7	4	3	7	7	7	5	6	5	5	4	3	5	13	0	5	4	2	4
0	2	High	3	Belgium	262B081	12	7	2003	Montfor	1	2	23	2	2017	5		5		2		2		2		1	1	6	6	6	5	4	5	6	5	7	5	4	6	6	4	5	3	4	9	0	5	4	4	4
0	2	High	3	Belgium	262B080	15	12	2003	Montfor	1	2	23	2	2017	5		5		2		2		2		1	1	7	7	7	1	7	1	1	1	1	1	1	1	4	4	4	4	4	6	0	7	7	1	1
0	2	High	3	Belgium	262B079	29	8	2003	Montfor	2	4	23	2	2017	5		5		2		2		2		1	1	5	5	4	3	7	6	7	6	6	5	5	4	7	7	6	5	2	5	30	5	5	4	5
0	2	High	3	Belgium	262B078	9	8	2004	Montfor	2	4	23	2	2017		gardener	3		2		2		2		1	1	6	4	5	5	5	5	5	5	7	5	4	6	5	5	1	1	2	3	0	4	4	3	3
0	2	High	3	Belgium	262B077	23	11	2004	Montfor	1	2	23	2	2017		neuropsychologist		psychologist	2		5	Indonesi	2		1	1	6	4	4	4	5	4	4	5	7	4	5	6	4	5	4	3	4	7	30	4	4	3	3
0	2	High	3	Belgium	262B076	2	7	2004	Montfor	1	2	23	2	2017	4		4		2		2		2		4	1	5	3	2	4	6	5	5	6	7	7	7	7	6	5	4	3	3	3	0	4	5	3	5
0	2	High	3	Belgium	262B075	1	9	2004	Montfor	2	4	23	2	2017		employee brico (store)			2		2		2		1	1	4	3	2	1	5	7	6	4	7	7	7	7	5	4	5	4	2	1	0	4	4	3	1
0	2	High	3	Belgium	262B074	23	11	2004	Montfor	2	4	23	2	2017	5		5		2		2		2		1	1	5	4	4	4	5	4	4	5	5	4	5	5	5	4	1	1	4	1	0	3	3	1	2
0	2	High	3	Belgium	262B073	22	10	2003	Montfor	2	4	23	2	2017		pilot		architect	2		2		2		1	3	6	5	5	5	7	4	6	7	7	4	5	5	7	6	2	2	3	4	0	7	4	4	6
0	2	High	3	Belgium	262B072	1	6	2004	Montfor	2	4	23	2	2017	5		4		2		2		2		1	1	6	5	4	5	6	7	7	7	7	7	7	7	6		3	2	3	3	30	6	3	2	1
0	2	High	3	Belgium	262B071	25	3	2004	Montfor	1	2	23	2	2017		ict		ict	2		2		2		1	1	6	3	5	4	4	4	5	5	7	5	6	7	6	4	1	1	2	1	0	5	5	6	4
0	2	High	3	Belgium	262B070	15	6	2004	goed???	1	2	23	2	2017			5		2		2		2		1	1	4	2	2	5	6	4	2	5	7	6	7	7	6	3	4	4	1			3	6	1	5
0	2	High	3	Belgium	262B069	27	5	2004	Montfor	1	2	23	2	2017	3		4		2		2		2		1	3	7	7	7	5	7	4	3	1	7	7	7	7	5	5	7	1	5	7	0	3	3	7	3
0	2	High	3	Belgium	262B068	22	3	2004	Montfor	1	2	23	2	2017	5		5		2		2		2		4	1	5	5	5	4	5	3	3	4	7	7	7	7	3	3	3	2	3	5	30	3	2	1	4
0	2	High	3	Belgium	262B067	12	10	2004	Montfor	1	2	23	2	2017	5		4		2		5	Poland	5	Polish	1	3	5	5	5	4	6	6	6	6	7	6	7	7	4	4	3	3	4	5	0	4	4	3	3
0	2	High	3	Belgium	262B066	12	10	2004	Montfor	1	2	25	2	2017					2		2		2		4	1	7	6	7	4	2	5	2	1	7	7	3	7	5	5	1	1	3	5	0	5	4	5	3
0	2	High	3	Belgium	262B041	13	1	2004	Montfor	2	4	24	2	2017	4		4		2		2		2		1	1	5	6	6	5	5	5	5	5	6	6	7	7	5	5	4	2	3	6	0	4	3	4	3
0	2	High	3	Belgium	262B040	16	4	2004	Montfor	2	4	24	2	2017	5		4		2		2		2		1	1	6	5	4	4	7	6	6	5	7	7	6	6	6	5	4	1	4	11	0	5	6	5	4
0	2	High	3	Belgium	262B039	30	3	2004	Montfor	1	2	23	2	2017	5		4		2		2		2		1	1	5	3	6	6	4	3	4	4	6	5	6	5	5	5	3	1	3	2	30	5	5	4	4
0	2	High	3	Belgium	262B038	22	4	2004	Montfor	1	2	23	2	2017		engineer	5		2		2		2		1	5	5	4	4		7	6	7	7	7	7	7	7	5	5	1	1	3	1	30	6	5	4	5
0	2	High	3	Belgium	262B037	11	9	2003	Montfor	1	2	23	2	2017		renovation company	3		5	Spain	5	Morrocco	5	Spanish	1	1	5	6	5	4	7	4	5	5	7	7	7	7	4	4	5	5	2	3	0	4	3	6	4
0	2	High	3	Belgium	262B036	20	4	2004	Montfor	1	2	23	2	2017				sports teacher	2		2		2		1	1	4	6	6	2	6	4	3	6	6	5	4	6	4	4	1	1	3	3	0	4	5	4	6
0	2	High	3	Belgium	262B035	23	6	2003	Montfor	1	2	23	2	2017	5		5		2		2		2		1	1	7	6	5	1	6	5	4	5	7	4	7	7	5	5	3	3	2	3	15	5	6	5	4
0	2	High	3	Belgium	262B034	21	5	2004	Montfor	1	2	23	2	2017	5		5		2		5	Germany	5	German	1	1	5	6	5	4	5	6	4	4	7	5	4	5	5	5	1	1	3	5	15	4	4	4	4
0	2	High	3	Belgium	262B033	15	2	2004	Montfor	1	2	22	2	2017	5		5		2		2		2		4	1	6	4	3	4	5	4	4	5	6	5	5	6	6	6	2	2	2	2	0	5	6	5	5
0	2	High	3	Belgium	262B032	25	4	2005	Montfor	1	2	23	2	2017	5		5		2		2		2		1	1	5	4	3	4	4	4	5	6	7	5	5	7	6	6	3	3	2	2	30	4	4	3	4
0	2	High	3	Belgium	262B031	2	6	2004	Montfor	1	2	23	2	2017		bank	5		5	Ethiopia	2		2		1	1	5	6	7	4	3	4	4	4	5	4	4	6	4	4	4	4	3	5	0	4	5	3	4
0	2	High	3	Belgium	262B030	27	7	2003	Montfor	1	2	23	2	2017	5			accountant	2		2		2		1	1	5	4	4	4	5	6	4	6	6	6	5	7	6	6	4	3	4	9	0	4	5	6	4
0	2	High	3	Belgium	262B029	6	5	2003	Montfor	2	4	23	2	2017	4		3		2		5	Poland	2		1	5	6	3	4	4	6	5	5	4	7	7	6	5	5	5	5	3	2	3	0	5	5	6	4
0	2	High	3	Belgium	262B028	22	1	2003	Montfor	1	2	23	2	2017	5			doctor	2		2		2		1	1	7	5	6	6	6	6	7	7	7	6	7	7	6	6	3	3	3	7	30	6	4	4	3
0	2	High	3	Belgium	262B027	1	10	2003	Montfor	1	2	23	2	2017	5		5		2		5	Zweden	2		1	1	6	5	5	6	5	3	3	5	5	6	3	5	5	5	3	3	2	3	0	5	3	3	3
0	2	High	3	Belgium	262B026	13	11	2003	Montfor	1	2	23	2	2017			4		2		2		2		1	1	6	4	4	3	4	5	5	7	7	7	5	7	5	5	3	1	5	10	0	5	5	5	4
0	2	High	3	Belgium	262B025	10	4	2003	Montfor	2	4	23	2	2017	5			psychologist	2		5	Poland	2		1	3	7	6	6	5	6	6	6	6	6	4	4	5	6	6	3	4	2	1	0	4	4	3	3
0	2	High	3	Belgium	262B024	24	1	2003	Montfor	1	2	23	2	2017		retirement insurances		nurse	2		2		2		1	1	5	7	6	5	5	6	4	5	5	4	6	7	6	5	1	1	5	8	0	5	4	4	3
0	2	High	3	Belgium	262B023	10	5	2004	Montfor	2	4	23	2	2017		police detective			2		5	Thailand	5	Thailand	1	3	5	4	4	3	5	3	4	5	4	4	4	4	3	4	4	3	1			3	4	3	4
0	2	High	3	Belgium	262B022	28	5	2003	Montfor	1	2	23	2	2017		police detective		investigating judge	2		2		2		1	4	5	6	7	4	7	6	7	7	7	4	6	7	4	3	5	4	5	7	0	5	4	3	3
0	2	High	3	Belgium	262B021	22	9	2003	Montfor	2	4	23	2	2017	5		5		2		2		2		1	1	7	4	1	5	7	7	6	7	7	7	7	7	6	6	1	1	1			4	3	1	2
0	2	High	3	Belgium	262B020	19	12	2003	Montfor	1	2	23	2	2017	5		5		2		2		2		1	5	7	4	3	5	5	4	5	4	7	7	7	7	5	5	3	1	2	2	0	4	6	4	4
0	2	High	3	Belgium	262B019	8	1	2004	Montfor	1	2	23	2	2017		writing computers		boss of cleaning company	2		5	Groot-Br	2		1	1	5	6	4	4	3	3	4	4	5	4	5	6	5	5	4	3	2	2	0	4	4	3	4
0	2	High	3	Belgium	262B018	5	7	2004	Montfor	1	2	23	2	2017		banker		banker	2		2		2		1	1	4	3	7	1	5	2	2	7	7	7	4	7	5	6	4	1	3	4	0	3	3	2	2
0	2	High	3	Belgium	262B017	25	4	2004	Montfor	1	2	23	2	2017		ordering software		nurse	2		2		2		1	1	5	2	5	2	4	5	4	6	6	5	5	6	4	5	1	1	3	3	0	4	4	3	4
0	2	High	3	Belgium	262B016	30	10	2004	Montfor	1	2	23	2	2017		ingeneer	5		2		2		2		1	1	4	5	4	3	5	4	5	5	6	6	6	6	5	6	4	4	3	1	0	5	5	5	4
0	2	High	3	Belgium	262B015	6	8	2004	Montfor	2	4	21	2	2017		office job			2		2		2		1	1	6	4	2	4	7	6	5	7	7	7	7	7	6	6	1	1	1			1	1	1	1
0	2	High	3	Belgium	262B014	25	5	2004	Montfor	2	4	23	2	2017		financial director	5		2		2		2		1	1	5	3	4	4	5	4	4	3	6	7	7	7	4	4	5	5	2	2	0	3	4	3	3
0	2	High	3	Belgium	262B013	17	2	2004	Montfor	2	4	23	2	2017		he sells roofs and is away a lot but I don't k	2	teacher	2		2		2		1	1	5	5	4	4	6	6	5	7	7	6	7	7	6	6	3	3	5	13	0	5	5	4	5
0	2	High	3	Belgium	262B012	23	1	2004	Montfor	2	4	23	2	2017		something with bank		sport psychologist	2		2		2		4	5	5	2	2	4	7	6	5	6	7	7	7	7	6	4	4	4	3			4	4	3	4
0	2	High	3	Belgium	262B011	13	9	2003	Montfor	2	4	23	2	2017	5		5		2		2		2		1	3	7	6	7	4	6	4	3	6	5	1	1	1	3	3	5	4	3	3	0	4	3	2	5
0	2	High	3	Belgium	262B010	13	11	2003	Montfor	1	2	23	2	2017	5		5		2		2		2		1	3	5	4	4	3	4	2	5	5	6	4	5	6	5	5	4	3	1			3	3	4	4
0	2	High	3	Belgium	262B009	29	5	2003	Montfor	2	4	22	2	2017	5		5		2		2		2		1	1	6	5	6	5	7	7	7	7	4	2	1	6	5	6	4	5	4	7	30	5	3	6	6
0	2	High	3	Belgium	262B008	18	4	2003	Montfor	1	2	23	2	2017	5		5		2		2		2		1	1	7	5	7	4	7	5	6	6	7	4	4	7	7	7	7	6	4	6	50	5	4	5	4
0	2	High	3	Belgium	262B007	2	3	2003	Montfor	2	4	23	2	2017	5		5		2		2		2		1	1	7	4	5	4	6	5	4	5	5	3	4	6	6	6	4	3	3	3	0	5	6	3	4
0	2	High	3	Belgium	262B006	4	8	2003	Montfor	2	4	23	2	2017	5		5		2		2		2		1	1	6	7	6	4	5	5	5	5	6	6	6	6	6	5	5	4	3	4	0	6	6	7	6
0	2	High	3	Belgium	262B005	18	3	2003	Montfor	1	2	23	2	2017	3		3		2		2		2		1	1	5	6	4	4	5	6	5	4	7	4	5	6	5	5	2	2	2	2	15	3	4	2	5
0	2	High	3	Belgium	262B004	17	8	2004	Montfor	2	4	23	2	2017	5		4		2		2		2		1	1	7	4	2	2	6	5	6	6	6	6	5	6	6	5	7	4	4	4	0	3	4	2	4
0	2	High	3	Belgium	262B003	16	4	2003	Montfor	1	2	22	2	2017		software-developer		teacher	2		2		2		1	1	5	3	4	5	5	6	4	7	6	3	4	3	3	5	4	3	3	4	30	5	6	4	5
0	2	High	3	Belgium	262B002	19	12	2003	Montfor	2	4	23	2	2017		mother does something with echos of heart		nurse	2		2		2		1	1	6	5	2	2	4	2	2	6	1	1	1	1	7	6	1	1	4	13	0	4	6	3	5
0	2	High	3	Belgium	262B001	5	7	2004	Montfor	1	2	26	2	2017	5		5		2		2		2		1	1	4	5	4	4	4	5	5	5	7	7	7	7	7	7	4	4	3	4	35	5	4	3	3
0	2	High	3	Belgium	251A587	22	10	2003	GTI DUF	1	2	22	2	2017		plummer	3		2		5	The Neth	2		1	1	7	6	4	4	5	5	6	6	7	7	6	7	6	5	1	1	3	2	30	5	5	4	3
0	2	High	3	Belgium	251A586	22	11	2003	GTI DUF	1	2	22	2	2017	3		3		2		2		2		1	1	6	7	5	4	5	5	6	7	6	7	7	6	5	5	1	1	5	2	30	5	5	4	6
0	2	High	3	Belgium	251A585	25	7	2003	GTI DUF	1	2	22	2	2017		nmbs (railway)			2		2		2		1	1	5	7	6	5	4	3	6	5	7	7	7	7	5	4	4	4	3	5	30	5	5	3	4
0	2	High	3	Belgium	251A584	2	1	2003	GTI DUF	1	2	22	2	2017	4		3		2		2		2		1	3	5	6	4	3	4	4	4	5	5	5	5	5	4	4	2	2	2	4	0	5	4	4	5
0	2	High	3	Belgium	251A583	8	7	2004	GTI DUF	1	2	22	2	2017	4		5		2		2		2		1	1	7	7	5	7	5	6	6	6	7	6	6	5	5	6	4	3	5	7	0	6	6	5	3
0	2	High	3	Belgium	251A582	6	2	2003	GTI DUF	1	2	22	2	2017	3		3		2		2		2		1	1	6	7	7	6	7	7	7	7	7	7	7	7	6	5	6	6	3	4	60	5	6	6	5
0	2	High	3	Belgium	251A581	13	2	2004	GTI DUF	1	2	22	2	2017	4		4		2		2		2		1	3	5	4	6	5	4	6	5	6	6	5	7	7	6	6	5	5	2	1	30	4	5	3	5
0	2	High	3	Belgium	251A580	7	8	2003	GTI DUF	1	2	22	2	2017	3			nurse	2		2		2		1	1	7	5	7	5	7	5	5	5	7	7	7	7	5	5	5	4	3	6	30	7	5	4	5
0	2	High	3	Belgium	251A579	23	1	2003	GTI DUF	1	2	22	2	2017				teacher	2		2		2		1	4	6	4	5	4	5	4	5	5	6	5	6	5	5	5	1	1	3	8	20	4	4	4	5
0	2	High	3	Belgium	251A578	30	12	2003	GTI DUF	1	2	22	2	2017					2		2		2		1	1	7	4	5	2	4	5	5	6	6	4	7	6	5	7	3	2	4	5	40	5	4	2	5
0	2	High	3	Belgium	251A577	14	6	2004	GTI DUF	1	2	22	2	2017		welder		cleaning	2		2		2		1	1	7	4	4	4	3	1	4	3	7	7	6	7	6	6	6	4	3	7	0	4	4	2	4
0	2	High	3	Belgium	251A529	29	11	2004	GTI DUF	1	2	22	2	2017		bank		nurse	2		5	CONGO	5	NINGOLA	3	1	5	7	6	4	6	3	4	3	6	3	5	6	6	5	4	3	3	5	0	5	5	6	4
0	2	High	3	Belgium	251A528	8	12	2002	GTI DUF	1	2	22	2	2017					2		5	Spain	2		1	3	5	3	6	3	4	3	3	6	6	3	4	5	1	5	3	3	3	4	30	3	3	3	2
0	2	High	3	Belgium	251A527	17	11	2004	GTI DUF	1	2	22	2	2017	4		4		2		2		2		1	3	5	7	5	3	5	5	3	5	5	5	4	5	5	5	4	4	3	4	30	3	4	3	5
0	2	High	3	Belgium	251A526	27	10	2003	GTI DUF	1	2	22	2	2017		salesman		laborante	2		2		2		1	1	5	4	4	3	4	5	3	5	4	4	4	4	7	6	4	3	4	19		5	3	4	4
0	2	High	3	Belgium	251A525		9	2004	GTI DUF	1	2	22	2	2017	2		4		2		2		2		1	4	4	5	5	4	5	4	5	5	5	5	4	5	6	6	4	5	3			5	5	5	4
0	2	High	3	Belgium	251A524	30	1	2004	GTI DUF	1	2	22	2	2017		unemployed		cleaning	2		2		2		3	3	6	6	5	5	5	5	4	4	6	5	4	5	5	5	1	1	2	8	0	4	3	4	3
0	2	High	3	Belgium	251A523	3	3	2003	GTI DUF	1	2	22	2	2017	3		3		2		2		2		1	1	5	3	3	3	5	4	4	4	5	4	4	4	4	4	3	3	3	5	0	4	3	4	3
0	2	High	3	Belgium	251A522	14	7	2003	GTI DUF	1	2	22	2	2017	4		2		5	greece	5	Greece	2		1	1	6	5	7	5	4	4	6	4	5	4	4	6	5	5	4	4	4	7	20	5	4	4	4
0	2	High	3	Belgium	251A521	30	9	2003	GTI DUF	1	2	22	2	2017	2		3		2		5	germany	2		1	1	4	5	5	4	6	3	3	4	7	3	6	5	3	4	1	1	2	1	30	5	3	6	5
0	2	High	3	Belgium	251A520	28	9	2004	GTI DUF	1	2	22	2	2017				nurse	2		2		2		1	1	3	2	1	2	4	4	1	2	7	4	7	7	7	5	5	4	1			4	4	3	4
0	2	High	3	Belgium	251A519	1	7	2004	GTI DUF	1	2	22	2	2017	3		3		2		2		2		4	3	5	6	4	3	5	1	1	6	7	6	4	6	6	5	4	5	1	1	0	5	7	4	2
0	2	High	3	Belgium	251A518	15	9	2003	GTI DUF	1	2	22	2	2017	5		5		2		2		2		1	1	5	4	3	6	5	3	5	1	7	7	6	5	7	7	1	1	2	1	0	5	6	4	7
0	2	High	3	Belgium	251A517	1	7	2003	GTI DUF	1	2			2017				architect	2		2		2		1	1	6	5	4		5	4	3	6	7	6	6	6	6	5	3	3	2	4	0	5	3	3	2
0	2	High	3	Belgium	251A516	7	8	2003	GTI DUF	1	2	22	2	2017	4				2		2		2		4	1	7	7	6	4	6	3	5	4	7	4	6	7	4	5	1	1	2	4	30	6	4	3	4
0	2	High	3	Belgium	251A515	26	7	2003	GTI DUF	1	2	22	2	2017	5		2		2		2		2		1	5	7	4	4	2	7	6	5	7	7	4	4	5	6	7	4	4	2	3	0	6	5	4	2
0	2	High	3	Belgium	251A514	24	7	2004	GTI DUF	1	2	22	2	2017		own boss	2		2		5	germany	2		1	3	7	6	7	4	7	1	1	4	7	1	4	4	1	1	1	1	2			4	3	4	3
0	2	High	3	Belgium	251A513	23	5	2003	GTI DUF	1	2	22	2	2017		roof worker	4		2		2		2		1	4	5	7	5	4	4	3	4	4	5	4	4	5	4	5	1	1	3	2	45	7	5	6	4
0	2	High	3	Belgium	251A512	28	12	2004	GTI DUF	1	2	22	2	2017		fireman		works in home for elderly	2		2		2		1	3	5	4	5	4	4	3	4	4	7	6	7	5	4	4	2	2	2	4	0	6	5	4	4
0	2	High	3	Belgium	251A511	23	7	2002	GTI DUF	1	2	22	2	2017			4		2		2		2		1	2	5	5	6	5	3	3	3	4	7	7	7	7	6	5	4	4	1	1	0	5	4	5	3
0	2	High	3	Belgium	241A668	3	1	2003	DOM BOS	2	4	20	2	2017	4		4		2		5	POLAND	5	Polish	1	1	6	4	5	5	7	6	6	6	5	3	4	5	5	5	5	5	1	3	30	5	6	5	4
0	2	High	3	Belgium	241A666	2	12	2002	GTI MOR	1	2	24	2	2017	3		3		2		5	poland	5	Polish	1	5	7	6	7	4	5	5	6	5	7	7	5	6	5	5	2	1	2	3	0	4	4	3	2
0	2	High	3	Belgium	241A665	29	1	2003	GTI MOR	1	2	24	2	2017	5		5		2		5	CURASAO	2		1	5	5	5	5	4	5	4	3	5	6	5	5	7	6	6	1	1	2	2	30	5	5	3	4
0	2	High	3	Belgium	241A664	5	2	2003	GTI MOR	1	2	24	2	2017		works in hospital	5		2		2		2		1	3	5	5	5	4	4	4	5	4	4	3	4	4	3	3	4	4	3	6	0	4	1	2	2
0	2	High	3	Belgium	241A663	7	7	2003	GTI MOR	1	2	24	2	2017	3		3		2		2		2		1	3	5	4	5	4	5	4	4	4	5	4	4	3	5	4	3	2	2	1	30	4	3	4	3
0	2	High	3	Belgium	241A662	11	7	2003	GTI MOR	1	2	24	2	2017		nurse			2		2		2		1	1	7	5	6	4	4	6	7	5	5	5	6	5	5	5	5	4	2	5	0	6	4	4	3
0	2	High	3	Belgium	241A661	21	6	2003	GTI MOR	2	4	24	2	2017				nurse	2		2		2		1	1	7	6	7	4	2	1	1	4	4	3	4	2	5	5	4	3	2	3	0	7	7	6	4
0	2	High	3	Belgium	241A660	7	8	2003	GTI MOR	1	2	24	2	2017	4		4		2		5	The Neth	2		1	5	7	4	7	3	7	3	1	3	7	3	1	7	6	6	6	4	5	20		3	7	4	3
0	2	High	3	Belgium	241A659	4	7	2003	GTI MOR	1	2	23	2	2017	5		3								1	1	3	3	1	1	2	1	3	1	2	3	3	1	5	4	3	1	2	1	30	1	1	1	1
0	2	High	3	Belgium	241A658	26	12	2002	GTI MOR	1	2	24	2	2017					2						1	1	4	5	3	5	3	3	3	3	3	4	4	7	4	5	3	3	2	3	0		3	3	2
0	2	High	3	Belgium	241A657	8	8	2003	GTI MOR	1	2	24	2	2017		sales in night store		cleaning	2		5	poland i	5	Polish	1	1	7	4	6	5	4	5	6	6	2	2	2	2	5	6	7	5	2	2	0	4	4	4	5
0	2	High	3	Belgium	241A656	12	2	2003	GTI MOR	1	2	24	2	2017	5		5		2		2		2		3	5	6	6	6	6	7	6	5	6	7	6	6	5	7	6	1	1	1			5	5	6	4
0	2	High	3	Belgium	241A654	27	10	2003	GTI MOR	1	2	21	2	2017		drives with tram	5		2		2		2		1	1	3	4	4	4	5	4	5	4	5	3	4	4	6	7			3	6	0	3	5	4	4
0	2	High	3	Belgium	241A653	13	4	2003	GTI MOR	1	2	21	2	2017		baker			2		5	KOSOVO	5	Albanese	1	1	7	6	5	3	7	7	7	7	7	4	5	7	6	6	7	7	3	6	0	5	5	5	5
0	2	High	3	Belgium	241A652	29	9	2003	GTI MOR	1	2	21	2	2017		in construction		home for elderly	2		2		2		1	1	5	5	5	3	5	3	4	3	6	5	5	5	5	5	5	4	3	7	30	5	5	3	3
0	2	High	3	Belgium	241A651	11	9	2002	GTI MOR	1	2	21	2	2017		restaurant			2		5	KROATIE	2		1	3	7	4	6	6	4	3	7	5	6	5	7	7	7	7	4	2	1			5	4	6	2
0	2	High	3	Belgium	241A650	1	1		GTI MOR	1	2	21	2	2017	5		5		5	MARS	5	INDIA	5	Chinese	1	1	7	7	7	7	7	7	7	7	7	7	7	7	7	7	6	4	5	32	2	6	4	7	7
0	2	High	3	Belgium	241A649		1			1	2	21	2	2017	5		5		5	mars	2		2		1	3	7	5	7	7	7	7	7	7	7	6	7	7	1	1	1	2	3	33	2	4	6	7	3
0	2	High	3	Belgium	241A648	18	3	2003	GTI MOR	1	2	21	2	2017					5	poland	5	poland	5	poland	1	5	6	4	4		5	4	5	5	5	4	3	3	4	4	4	4	3	3	40	4	3	5	4
0	2	High	3	Belgium	241A647	26	4	2003	GTI MOR	1	2	21	2	2017				teacher	2		2		2		1	3	4	4	4	4	5	5	3	4	4	3	4	4	4	3	4	4	2	1	40	3	3	3	3
0	2	High	3	Belgium	241A646	19	2	2005	GTI MOR	1	2	24	2	2017				nurse	2		2		5	French	1	1	7	6	5	2	6	4	4	5	7	5	4	4	7	6	4	4	3	5	30	6	6	4	4
0	2	High	3	Belgium	241A645	14	2	2003	GTI MOR	1	2	24	2	2017	4		4		2		2		2		1	1	5	4	4	4	4	4	5	5	6	6	5	5	4	4	4	4	1	3	30	4	4	5	5
0	2	High	3	Belgium	241A644	13	7	2002	GTI MOR	1	2	23	2	2017	5		5		2		5	germany	2		1	5	5	4	4	4	5	4	3	5	5	4	4	5	5	4			4	0	15	4	4	3	3
0	2	High	3	Belgium	241A643	13	10	2001	GTI MOR	1	2	24	2	2017					5	Thailand	5	Thailand	5	THAIS	4	1	4	3	4	4	5	4	5	4	4	6	4	4	4	4	1	1	1			4	5	4	4
0	2	High	3	Belgium	241A642	26	12	2002	GTI MOR	1	2	24	4	2017	3		3		2		5	poland	5	Polish	1	1	5	4	5	4	7	4	4	6	7	4	4	5	4	4	5	3	3	3	0	4	4	5	4
0	2	High	3	Belgium	241A633	21	8	2003	GTI MOR	1	2	21	2	2017		worker	4		2		2		2		1	1	6	5	7	4	3	3	3	3	7	7	7	7	5	5	3	3	2	4	30	4	3	3	4
0	2	High	3	Belgium	241A630	23	6	2003	GTI MOR	1	2	21	2	2017	1		3		2		5	Spain, m	2		1	1	7	6	5	5	4	4	2	4	4	2	5	6	5	4	6	7	3	6	30	5	4	5	4
0	2	High	3	Belgium	241A629	5	12	2002	GTI MOR	2	4	21	2	2017				no job	2		2		2		1	5	6	6	6	3	5	5	4	5	6	6	6	6	5	5	5	4	2	4	0	5	4	4	3
0	2	High	3	Belgium	241A628	30	12	2002	GTI MOR	1	2	21	2	2017				cleaning	2		5	Morrocco	5	Arabic	1	3	7	7	7	4	7	1	1	5	7	1	1	6	5	5	7	7	1			7	7	6	6
0	2	High	3	Belgium	241A627	22	5	2002	GTI MOR	1	2	21	2	2017	5		4		5	Turkey	5	Turkey	5	Turkish	1	3	5	7	7	4	5	4	5	5	5	3	4	5	5	5	7	7	2	1	6	5	5	7	3
0	2	High	3	Belgium	241A626	22	6	2003	GTI MOR	1	2	21	2	2017	5		4		5	KOSOVO	5	KOSOVO	5	Albanese	1	1	5	5	7	4	5	4	5	5	7	5	7	7	6	7	7	7	2	3	0	3	5	7	4
0	2	High	3	Belgium	241A625	23	4	2002	GTI MOR	1	2	21	2	2017	1		1		2				2		1	5	7	1	1	3	5	7	6	5	7	1	1	1	1	4	1	4	5	5		2	4	4	3
0	2	High	3	Belgium	241A624	5	8	2002	GTI MOR	1	2	21	2	2017	2		1		5	Spain	5	Spain mo	5	Spanish	1	4	5	5	5	5	5	4	1	5	5	4	4	5	5	6	6	6	2	2	20	5	5	5	4
0	2	High	3	Belgium	241A510	6	7	2002	GTI DUF	1	2	22	2	2017					2		2		2		1	1	5	3	5	5	5	3	3	5	5	2	2	5	7	5	5	5	3	4	0	5	5	3	3
0	2	High	3	Belgium	241A509	19	2	2003	GTI DUF	1	2	22	2	2017	5		4		5	poland	5	poland	5	Polish	1	4	4	3	5	4	5	6	6	6	7	7	7	7	3	4	6	5	3	4	30	4	4	4	5
0	2	High	3	Belgium	241A508	8	4	2004	GTI DUF	1	2	22	2	2017				secretary	2		2		2		1	3	7	4	6	4	5	4	4	5	5	4	4	4	6	6	4	4	2	3	30	5	4	4	3
0	2	High	3	Belgium	241A507	30	5	2004	GTI DUF	1	2	22	2	2017				doctor	2		2		2		1	1	5	6	4	3	4	6	6	6	6	3	5	7	7	7	6	7	3	7	30	3	5	3	6
0	2	High	3	Belgium	241A506		9	2004	GTI DUF	1	2	22	2	2017	4		4		2		2		2		1	1	4	4	5	5	5	5	4	5	6	6	5	5	4	5	4	4	1	0	0	4	4	4	4
0	2	High	3	Belgium	241A505	7	6	2004	GTI DUF	1	2	22	2	2017		mechanic		teacher	2		2		2		4	1	7	4	5	4	5	6	4	4	6	6	6	6	6	5	7	7	4	8	0	4	4	5	4
0	2	High	3	Belgium	241A504	19	2	2004	COLOMA	1	2	6	3	2017		police officer			2		2		5	French	1	1	6	4	5	7	4	3	3	6	6	5	4	6	6	6	4	4	2	2		7	6	7	4
0	2	High	3	Belgium	241A503	27	12	2002	GTI MOR	1	2	24	2	2017		truck driver		doctor	2		5	Russia	5	Russian	1	1	5	5	4	4	4	5	5	5	5	6	5	7	5	5	3	3	3	4	0		4	4	4
0	2	High	3	Belgium	241A502	13	2	2003	GTI MOR	1	2	24	2	2017	5		5		2		2		2		1	3	6	5	4	3	4	3	3	4	6	6	4	6	6	6	4	4	5	5	30	5	5	3	4
0	2	High	3	Belgium	241A500	5	2	2003	GTI MOR	1	2	23	2	2017		works in hospital	4		2		2		2		1	3	5	5	5	4	4	4	5	4	4	3	4	4	3	3	4	4	3	6		4	1	2	2
0	2	High	3	Belgium	241A499	2	12	2002	GTI MOR	1	2	24	2	2017	3		3		2		5	poland	5	Polish	1	5	7	6	7	3	5	5	6	5	7	7	5	6	5	5	2	1	2	3	0	4	4	3	2
0	2	High	3	Belgium	241A465	13	8	2003	GTI MOR	1	2	24	2	2017		fire safety	3		2		2		2		1	1	3	4	4	3	6	4	3	6	6	5	4	6	5	5	4	4	2	4	0	4	3	3	3
0	2	High	3	Belgium	241A464	28	3	2003	GTI MOR	1	2	24	2	2017				nurse	2		2		2		1	1	6	4	7	5	3	4	6	4	7	7	6	7	6	6	1	1	5	10	0	6	5	1	4
0	2	High	3	Belgium	241A463	3	4	2002	GTI MOR	1	2	24	2	2017					2		5	Italy ar	5	Italian	1	1	7	7	7	7	7	4	1	7	7	1	7	5	1	2	7	7	5	7	0	5	4	7	1
0	2	High	3	Belgium	241A462	21	8	2003	GTI MOR	1	2	24	2	2017	4		4		2		2		2		1	1	5	4	4	4	5	4	3	4	5	4	6	6	6	6	5	5	3	4	0	5	4	3	3
0	2	High	3	Belgium	241A461	24	11	2003	GTI MOR	1	2	24	2	2017	3		3		2		2		2		1	3	4	5	7	4	3	4	3	4	7	4	4	7	3	3			3	4	30	3
0	2	High	3	Belgium	241A460	2	7	2003	GTI MOR	1	2	24	2	2017	3		3		2		5	BOSNIE	5	BOSNISCH	1	1	5	5	4	3	5	5	4	5	5	5	5	5	4	4	7	7	1			3	4	3	3
0	2	High	3	Belgium	241A459	13	8	2003	GTI MOR	1	2	24	2	2017	3		3		2		5	Morrocco	5	BERBERS	1	1	7	5	5	3	6	2	5	5	5	1	4	7	4	2	7	7	1			5	5	6	3
0	2	High	3	Belgium	241A458	7	3	2002	GTI MOR	1	2	23	2	2017		mechanic		chef	5	poland	5	poland	5	Polish	1	1	5	5	5	4	6	5	7	5	7	6	7	7	6	6	7	6	3	18	30	5	5	4	5
0	2	High	3	Belgium	241A457	17	1		GTI MOR	1	2	24	2	2017		teacher		teacher	2		2		2		4	5	6	1	4	4	1	1	1	1	6	4	5	5	3	3	7	5	4	7	30	6	4	2	4
0	2	High	3	Belgium	241A456	20	3	2003	GTI MOR	1	2	24	2	2017	5		3		2		5	KOSOVO	5	KOSOVAAR	1	1	5	3	4	3	5	4	4	5	7	6	6	7	5	5	4	4	1			4	5	3	4
0	2	High	3	Belgium	241A455	8	4	2003	GTI MOR	1	2	24	2	2017	1		3		2		2		2		1	1	6	5	4	5	5	5	3	4	5	1	1	3	4	5	1	1	1	0	0	3	3	3	3
0	2	High	3	Belgium	241A454	13	6	2003	GTI MOR	1	2	24	2	2017	3		3		2		5	Portugal	2		1	1	5	7	4	4	3	3	1	1	6	5	5	5	5	5	1	1	2	1	30	5	5	4	3
0	2	High	3	Belgium	241A453	20	5	2003	GTI MOR	1	2	24	2	2017	3		3		2		2		2		1	1	5	5	7	4	4	1	4	4	5	4	5	6	4	4	1	1	3	3		7	5	5	3
0	2	High	3	Belgium	241A452	26	8	2003	GTI MOR	2	4	23	2	2017	1		3		2		2		2		2	5	5	5	5	4	5	3	3	3	3	1	1	1	5	4	4	3	2	3	30	4	5	4	4
0	2	High	3	Belgium	241A451	23	8	2003	GTI MOR	1	2	24	2	2017		don't have a father		nurse	2				2		1	4	5	7	7	1	5	1	1	5	7	1	1	6	7	7	7	4	3	3		5	7	7	7
0	2	High	3	Belgium	241A450	4	8	2002	GTI MOR	1	2	24	2	2017			3		2		5	poland	5	Polish	1	5	5	4	7	4	5	6	4	6	5	4	4	5	5	5	1	1	4	8	30	4	4	4	4
0	2	High	3	Belgium	232B405	1	11	2002	Sint-Ja	1	2	15	2	2017		owner of bar and construction worker		owner bar	5	Viëtnam	5	Viëtnam	5	vietnam	1	4	5	6	7	5	6	6	4	5	4	5	4	5	4	4	4	4	5	8		4	6	4	4
0	2	High	3	Belgium	232B404	11	8	2004	Sint-Ja	2	4	15	2	2017		army	4		2		5	italy	2		1	1	5	5	6	6	7	5	4	6	7	4	5	6	5	6	5	4	4	9	30	5	5	7	4
0	2	High	3	Belgium	232B403	16	7	2003	Sint-Ja	2	4	15	2	2017	3		3		2		5	Turkey	2		3	1	6	4	4	4	5	5	6	7	7	3	4	4	4	4	7	7	1				5	4	4
0	2	High	3	Belgium	232B402	25	7	2003	Sint-Ja	1	2	15	2	2017				laborant	2		5	poland	2		4	1	5	5	5	4	4	1	1	2	7	5	4	7	5	5	1	1	1	2		5	3	4	4
0	2	High	3	Belgium	232B401	10	6	2003	Sint-Ja	1	2	15	2	2017	3		4		2		2		2		1	1	7	4	5	5	5	6	6	7	4	4	6	5	5	6	4	4	3	4		6	4	6	4
0	2	High	3	Belgium	232B400	14	11	2003	Sint-Ja	1	2	15	2	2017	4		5		5	marocco	5	The Neth	5	Morrocco	1	1	7	5	6	4	5	4	3	6	7	7	7	7	6	5	7	7	3			7	7	7	4
0	2	High	3	Belgium	232B399	1	12	2003	Sint-Ja	1	2	15	2	2017		electricien			2		5	Turkey	5	Turkish	1	1	3	2	2	4	5	3	4	3	5	5	6	4	4	3	4	4	2	3	45	3	4	3	4
0	2	High	3	Belgium	232B398	19	4	2004	Sint-Ja	1	2	15	2	2017					2		2		2		1	1	4	2	5	4	4	4	4	5	5	4	4	5	3	4	3	3	5	6		4	4	3	4
0	2	High	3	Belgium	232B397	25	9	2003	Sint-Ja	1	2	15	2	2017	1			cleaning	2		2		2		1	1	5	5	5	6	3	4	2	2	7	5	4	7	6	4	4	3	3	10	20	4	3	5	4
0	2	High	3	Belgium	232B396	13	8	2003	Sint-Ja	1	2	15	2	2017				used to be hair dresser	2		5	germany	2		1	1	5	6	5	4	5	3	4	5	5	5	4	5	4	3	5	4	3	12		6	5	6	4
0	2	High	3	Belgium	232B395	3	6	2004	Sint-Ja	2	4	15	2	2017			5		2		2		2		1	1	7	5	1	4	5	4	3	4	7	6	6	7	6	5	5	5	5	11		4	4	4	3
0	2	High	3	Belgium	232B394	25	6	2004	Sint-Ja	1	2	15	2	2017	5		5		2		5	Albanië	2		1	1	7	7	7	5	7	3	5	6	7	7	7	7	6	5	6	5	5	12		6	1	6	5
0	2	High	3	Belgium	232B393	23	5	2004	Sint-Ja	2	4	15	2	2017		construction worker		cleaning	2		2		2		1	3	6	7	5	3	5	4	3	5	5	4	5	5	5	5	3	3	5	10	30	4	4	3	4
0	2	High	3	Belgium	232B392	10	12	2004	Sint-Ja	2	4	15	2	2017		factory worker		nurse	2		2		2		4	1	4	5	1	3	5	5	5	4	7	7	7	7	4	5	4	4	5	12	10	3	3	3	1
0	2	High	3	Belgium	232B391	28	4	2004	Sint-Ja	2	4	15	2	2017		salesman		cleaning	5	The Neth	5	The Neth	2		1	1	5	6	4	4	7	7	7	5	7	5	5	7	6	7	5	6	3	4	30	5	5	6	3
0	2	High	3	Belgium	232B390	1	8	2003	Sint-Ja	1	2	15	2	2017		ceo		ceo	2		2		2		1	1	5	5	4	5	7	4	5	5	7	6	6	7	5	5	3	2	4	6	45	5	4	4	4
0	2	High	3	Belgium	232B389	15	6	2003	Sint-Ja	1	2	15	2	2017					2		5	italy	2		1	1	4	5	5	4	7	4	6	4	7	3	5	6	4	3	3	4	5	7		5	4	4	4
0	2	High	3	Belgium	232B388	3	9	2004	Sint-Ja	1	2	15	2	2017		electricien		teacher	2		2		2		1	1	7	7	5	4	5	1	1	7	7	6	1	7	6	6	1	1	3	10		5	3	3	5
0	2	High	3	Belgium	232B387	24	7	2004	Sint-Ja	1	2	15	2	2017		bus driver		salesman	2		2		2		1	1	4	5	4	2	4	1	4	3	6	6	6	6	4	3	5	6	3	7	30	4	5	6	4
0	2	High	3	Belgium	232B386	22	1	2004	Sint-Ja	1	2	15	2	2017	5		3		2		5	italy	2		1	3	7	7	7	5	7	7	4	7	7	4	5	6	5	5	4	4	5	14		7	4	7	4
0	2	High	3	Belgium	232B385	18	3	2003	Sint-Ja	1	2	15	2	2017	3		3		2		5	italy. S	5	Italian.	1	1	5	4	5	4	6	5	5	6	6	5	6	7	4	4	5	5	4	8		5	6	4	4
0	2	High	3	Belgium	232B384	17	6	2003	Sint-Ja	1	2	15	2	2017					2		2		2		1	1	5	4	6	4	1	2	6	7	7	2	4	4	4	4	1	2	4	8		3	4	1	5
0	2	High	3	Belgium	232B383	9	12	2004	Sint-Ja	2	4	15	2	2017		project manager		kinesist	2		5	The Neth	2		1	1	6	5	4	6	5	5	4	6	5	3	4	4	5	6	1	1	3	8	30	4	3	3	5
0	2	High	3	Belgium	232B382	5	2	2004	Sint-Ja	1	2	15	2	2017	5		5		2		2		2		1	3	7	3	2	2	5	4	3	6	6	5	4	6	6	6	5	5	3	4		4	6	3	5
0	2	High	3	Belgium	232B381	24	4	2003	Sint-Ja	1	2	15	2	2017		worker		nurse	2		5	Russia	2		1	5	6	5	5	4	5	5	3	4	6	6	5	6	4	4	3	3	5	10		5	4	3	5
0	2	High	3	Belgium	232B380	17	4	2003	Sint-Ja	1	2	15	2	2017	4		5		2		5	Algerije	5	French	1	1	6	5	4	3	7	6	3	6	7	7	7	7	5	6	7	7	5	10	30	6	7	5	4
0	2	High	3	Belgium	232B379	1	6	2004	Sint-Ja	1	2	15	2	2017	4			hairdresser	2		5	italy	2		1	1	7	6	4	4	5	1	4	1	7	7	7	7	6	5	5	4	3	4		4	4	5	1
0	2	High	3	Belgium	232B378	7	1	2004	Sint-Ja	2	4	15	2	2017					2		2		2		4	3	6	5	3	2	5	5	4	7	6	6	7	7	6	6	6	5	3	4		4	3	4	4
0	2	High	3	Belgium	232B377	26	2	2004	Sint-Ja	1	2	15	2	2017				housewife	2		5	greece	2		2	1	5	7	6	4	7	6	5	4	7	5	7	7	5	7	4	4	3	10		5	5	6	5
0	2	High	3	Belgium	232B376	26	7	2004	Sint-Ja	1	2	15	2	2017		driver	4		2		5	poland.	2		1	1	6	5	5	5	5	3	4	6	7	5	5	7	4	5	1	1	3	7	15	5	4	5	5
0	2	High	3	Belgium	232B375	24	2	2003	Sint-Ja	1	2	15	2	2017	3		4		2		2		2		1	1	6	6	6	6	6	3	4	6	6	2	2	6	6	6	6	6	5	11		6	7	7	4
0	2	High	3	Belgium	232B374	11	8	2003	Sint-Ja	1	2	15	2	2017		driver	3		2		2		2		1	1	7	6	7	5	6	1	5	5	7	4	7	7	4	5	3	2	5	10	5	7	6	7	5
0	2	High	3	Belgium	232B373	25	3	2003	Sint-Ja	1	2	15	2	2017	4		4		2		2		2		1	1	6	6	6	6	4	4	5	4	6	4	5	5	6	6	6	6	5	11		5	4	5	5
0	2	High	3	Belgium	232B372	23	2	2003	Sint-Ja	2	4	15	2	2017		constructio worker			2		2		2		1	3	6	5	6	2	7	6	6	7	7	2	4	7	6	6	4	3	3	5		5	4	5	6
0	2	High	3	Belgium	232B371	9	5	2003	Sint-Ja	2	4	15	2	2017					2		5	poland	5	sign lan	4	3	4	4	2	1	5	4	4	4	6	7	7	7	6	6	5	5	1			5	6	4	6
0	2	High	3	Belgium	232B370	28	1	2004	Sint-Ja	2	4	15	2	2017	4		5		2		2		2		1	3	3	5	4	4	5	4	4	5	7	7	6	7	6	4	4	3	2	2	30	5	3	3	3
0	2	High	3	Belgium	232B369	3	11	2004	Sint-Ja	2	4	15	2	2017		army	5		2		2		2		1	1	5	4	3	4	5	4	4	3	7	7	7	7	5	5	3	1	3	8		3	4	3	3
0	2	High	3	Belgium	232B368	19	3	2004	Sint-Ja	1	2	15	2	2017		factory worker		teacher	2		2		2		1	1	4	5	4	4	5	4	5	6	7	5	5	7	4	5	4	4	3	10		4	4	3	4
0	2	High	3	Belgium	232B367	9	2	2004	Sint-Ja	1	2	15	2	2017			4		2		2		2		4	1	4	7	4	3	5	5	6	4	7	7	7	7	7	7	3	3	5	11		7	5	4	5
0	2	High	3	Belgium	232B366	27	2	2002	Sint-Ja	1	2	15	2	2017			2		2		5	Turkey	5	Turkish	1	1	7	6	7	5	7	4	4	5	7		6	5	4	5	7	7	3	8		7	7	3	1
0	2	High	3	Belgium	232B365	8	1	2004	Sint-Ja	2	4	15	2	2017		police officer		kindergarten teacher	2		2		2		1	5	5	5	4	3	5	5	4	4	5	5	5	5	2	4	4	4	3	4		4	4	3	4
0	2	High	3	Belgium	232B364	28	6	2004	Sint-Ja	2	4	15	2	2017				boss of company	2		5	Slovakij	2		1	4		3		2	6	6	6	6	6	6	6	6	4	4	7	7	5	11		4	4	3
0	2	High	3	Belgium	232B363	15	2	2004	Sint-Ja	1	2	15	2	2017		mail man		helps older people	2		2		2		4	1	7	4	5	4	3	1	5	6	5	7	6	7	7	7	5	5	2	3	50	5	5	5	4
0	2	High	3	Belgium	232B362	18	12	2004	Sint-Ja	2	4	15	2	2017		painter	4		2		2		2		1	1	7	7	6	5	6	7	6	6	7	5	5	6	6	5	4	4	2	1	30	7	6	6	6
0	2	High	3	Belgium	232B361	23	9	2004	Sint-Ja	2	4	15	2	2017				teacher	2		2		2		1	1	5	2	4	3	5	6	3	4	7	4	4	5	5	4	2	2	4	10	30	4	3	3	3
0	2	High	3	Belgium	232B360	30	7	2003	Sint-Ja	1	2	15	2	2017		makes furniture	5		2		5	Morrocco	5	Morrocco	1	1	6	6	5	4	5	4	4	6	7	7	7	7	4	6	7	7	3			6	6	5	5
0	2	High	3	Belgium	232B359	5	6	2003	Sint-Ja	1	2	15	2	2017				house wife	2		5	greece	2		1	1	5	5	3	4	5	6	5	4	7	7	6	6	6	6	5	4	5	14	30	6	6	6	5
0	2	High	3	Belgium	232B358	27	6	2003	Sint-Ja	1	2	15	2	2017		gardener		cleaning	2		5	Kosovo	5	Kosovaar	1	1	5	3	4	3	6	7	6	6	7	7	6	7	5	7	7	7	4	8	40	4	6	7	5
0	2	High	3	Belgium	232B357	27	2	2002	Sint-Ja	1	2	15	2	2017		bricklayer		student	2		5	The Neth	2		1	3	7	5	7	4	6	7	6	6	6	6	6	6	5	4	1	1	4	12		6	6	4	4
0	2	High	3	Belgium	232B356	4	3	2005	Sint-Ja	1	2	15	2	2017		teacher		secretary	2		2		2		1	1	5	4	5	4	7	4	5	6	7	7	7	7	7	7	4	1	5	7	30	4	5	7	6
0	2	High	3	Belgium	232B355	11	3	2003	Sint-Ja	1	2	15	2	2017				teacher	2		2		2		1	1	5	6	5	4	7	4	1	7	7	7	4	7	6	6	3	2	4	9		5	4	7	3
0	2	High	3	Belgium	232B354	14	6	2004	Sint-Ja	1	2	15	2	2017		teacher	5		2		2		2		1	1	5	4	4	4	5	5	5	6	6	5	5	6	5	5	2	2	3	6		5	5	4	5
0	2	High	3	Belgium	232B353	14	7	2003	Sint-Ja	1	2	15	2	2017		mine worker	3		2		5	italy	5	Italian	1	1	4	5	5	4	1	1	1	1	6	6	4	4	5	4	7	5	3	4		4	4	7	5
0	2	High	3	Belgium	232B352	20	11	2004	Sint-Ja	1	2	15	2	2017			1		2		5	Turkey	5	Turkish	1	1	4	2	3	1	7	5	4	6	7	7	5	7	6	7	7	7	5	6	30	4	7	6	5
0	2	High	3	Belgium	232B351	4	3	2003	Sint-Ja	1	2	15	2	2017	3		3		2		5	Morrocco	2		1	1	5	4	4	4	4	3	4	4	6	5	6	6	4	5	4	4	5	9	30	5	4	4	4
0	2	High	3	Belgium	232B350	3	9	2004	Sint-Ja	1	2	15	2	2017		auto mechanic			5	The Neth	5	The Neth	2		1	5	6	1	4	4	5	5	5	4	7	5	7	6	7	7	5	6	3	6		5	5	5	5
0	2	High	3	Belgium	232B349	31	3	2003	Sint-Ja	1	2	15	2	2017	4		4		2		5	Spain	2		1	1	7	6	6	5	7	7	7	7	7	7	7	7	6	6	7	7	5	14		6	6	6	5
0	2	High	3	Belgium	232B348	29	2	2004	Sint-Ja	1	2	15	2	2017	5		5		2		5	The Neth	2		1	1	5	5	4	6	4	4	6	5	7	6	7	7	5	4	4	4	4	9	10	7	6	7	6
0	2	High	3	Belgium	232B347	26	4	2003	Sint-Ja	1	2	15	2	2017					2		2		2		1	5	4	4	4	4	5	3	4	6	6	6	6	6	6	5	2	2	5	9	30	5	5	5	4
0	2	High	3	Belgium	232B346	19	3	2003	Sint-Ja	1	2	15	2	2017		technical drawer		salesman	2		2		2		1	1	5	5	6	4	5	5	6	6	6	6	6	6	7	7	1	1	5	10	5	5	4	5	4
0	2	High	3	Belgium	232B345	5	4	2003	Sint-Ja	1	2	15	2	2017		ict-advisor		accountant	2		5	The Neth	2		1	5	7	2	4	4	6	5	6	6	7	7	7	7	7	7	4	3	4	8		4	7	3	7
0	2	High	3	Belgium	232B344	1	11	2003	Sint-Ja	1	2	15	2	2017		engineer		secretary	2		5	italy	2		1	1	2	5	3	2	6	5	5	5	7	5	6	7	3	4	2	1	4	10		4	5	5	3
0	2	High	3	Belgium	232B343	7	5	2003	Sint-Ja	1	2	15	2	2017			4		2		2		2		1	1	4	4	5	4	3	4	5	5	6	5	7	6	6	6	3	3	5	12	30	5	5	4	4
0	2	High	3	Belgium	232B342	3	1	2003	Sint-Ja	1	2	15	2	2017			3		2		5	Turkey	5	Turkish	1	1	4	5	3	4	5	4	5	6	5	4	5	7	4	3	7	7	5	8		4	3	5	4
0	2	High	3	Belgium	232B341	10	1	2003	Sint-Ja	1	2	15	2	2017		director in education			2		2		2		1	1	5	4	2		5	5	4	6	7	6	6	7	5	6	7	6	4	10		5	5	4	5
0	2	High	3	Belgium	232B340	25	9	2003	Sint-Ja	1	2	15	2	2017		heating	4		2		5	Spain	2		1	1	6	4	5		2	4	5	2	6	5	6	6	5	5	2	4	3	5		5	4	5	4
0	2	High	3	Belgium	232B339	24	5	2003	Sint-Ja	1	2	15	2	2017					2		5	Spain	2		1	1	6	4	4	4	4	5	4	5	6	6	4	6	5	5	4	4	3	10		4	4	4	4
0	2	High	3	Belgium	232B338	7	7	2003	Sint-Ja	1	2	15	2	2017		army		nurse	2		2		2		1	1	4	4	5	4	7	7	7	7	5	4	4	7	5	5	4	1	5	12	30	7	5	7	6
0	2	High	3	Belgium	232B337	29	8	2003	Sint-Ja	1	2	15	2	2017	3		3		2		2		2		1	3	7	4	5	1	5	5	4	6	6	6	6	7	5	5	4	3	3	4	20	5	4	5	4
0	2	High	3	Belgium	232B332	20	11	2004	Sint-Ja	2	4	15	2	2017		fireman		educator of disabled adults	2		2		2		1	1	5	7	4	4	6	5	6	4	7	7	7	6	7	6	4	4	4			6	5	6	5
0	2	High	3	Belgium	232B331	20	11	2004	Sint-Ja	2	4	15	2	2017		fireman		educator of disabled adults	2		2		2		4	1	6	4	5	3	6	7	6	7	7	5	6	7	6	5	5	4	5	10		4	6	4	3
0	2	High	3	Belgium	232B330	22	4	2002	Sint-Ja	2	4	15	2	2017	3		2		2		5	Turkey	5	Turkish	1	1	6	7	7	7	5	4	5	5	4	4	5	5	4	3	4	3	1			6	5	3	5
0	2	High	3	Belgium	232B329				Sint-Ja			15	2	2017									2		1	1	5	2	4	3	6	4	1	6	7	7	6	7	6	6	1	4	3	3	0	5	5	2	2
0	2	High	3	Belgium	232B328	9	3	2003	Sint-Ja	1	2	15	2	2017		died		widow	2		5	Morrocco	2		1	4	6	3	4	3	4	3	1	3	7	7	7	6	4	5	7	7	1			6	5	7	3
0	2	High	3	Belgium	232B327	30	12	2003	Sint-Ja	2	4	15	2	2017	4		3		5	italy	5	Morrocco	5	Morrocco	1	1	7	1	4	4	7	4	3	7	7	7	7	7	7	7	7	7	1
0	2	High	3	Belgium	232B326	25	9	2003	Sint-Ja	1	2	15	2	2017		hair dresser		casino	2		5	The Neth	2		1	5	7	7	7	4	7	7	7	7	7	4	4	4	1	1	1	1	4	10		7	6	7	6
0	2	High	3	Belgium	232B325	15	3	2004	Sint-Ja	1	2	15	2	2017				cleaning	2		5	Turkey	5	Turkish	1	1	7	1	1	4	7	7	7	7	7	6	7	6	7	7	7	7	3	8	10	3	1	3	5
0	2	High	3	Belgium	232B324	15	7	2002	Sint-Ja	1	2	15	2	2017				sewer	5	poland	5	poland	5	Polish	4	1	6	4	4	4	5	4	5	5	5	5	5	5	5	5	5	4	5	12		4	5	4	4
0	2	High	3	Belgium	232B323	9	11	2003	Sint-Ja	2	4	15	2	2017					2		2		2		1	1	4	3	4	3	6	4	4	5	7	7	6	5	5	5	4	1	5	9		4	4	4	4
0	2	High	3	Belgium	232B322	30	9	2003	Sint-Ja	1	2	15	2	2017	4		4		2		2		5	French	1	5	4	5	5	5	6	5	5	6	7	7	7	7	6	6	1	1	3	10		6	6	6	5
0	2	High	3	Belgium	232B321	3	7	2003	Sint-Ja	2	4	15	2	2017		construction worker		student	2		2		2		4	5	5	4	4	3	7	7	7	7	6	5	6	7	4	3	1	1	5			4	4	3	4
0	2	High	3	Belgium	232B320	17	4	2004	Sint-Ja	2	4	15	2	2017	4				2		2		2		1	1	5	5	4	4	7	5	5	6	6	5	6	6	6	5	4	4	4	8		5	4	5	3
0	2	High	3	Belgium	232B310	11	10	2003	Sint-Ja	1	2	15	2	2017	4		4		2		2		2		1	1	5	6	4	4	5	4	6	6	7	5	5	6	5	5	3	3	5	13		5	5	5	4
0	2	High	3	Belgium	232B309	8	12	2003	Sint-Ja	1	2	15	2	2017		painter		kindergarten teacher	2		5	The Neth	2		1	3	6	5	6	4	5	5	5	5	6	6	6	6	6	6	4	1	4	12		5	5	6	4
0	2	High	3	Belgium	232B308	8	7	2003	Sint-Ja	1	2	15	2	2017	1		4		2		5	italy	2		1	1	7	5	7	5	1	1	2	2	5	4	4	3	7	7	5	4	4	14		5	5	7	4
0	2	High	3	Belgium	232B307	29	8	2003	Sint-Ja	1	2	15	2	2017	1		3		2		5	italy	2		1	5	4	3	5	4	5	4	3	3	5	4	3	4	6	5	3	3	3	9	30	4	4	3	4
0	2	High	3	Belgium	232B306	1	3	2003	Sint-Ja	2	4	15	2	2017				accountant	2		2		2		1	5	4	3	5	4	6	5	6	5	7	6	7	6	6	6	2	1	4	10	30	4	3	3	3
0	2	High	3	Belgium	222A677	26	11	2003	MSK Kee	2	4	22	2	2017	5		5		2		5	Italy	2		1	1	7	2	1		6	6	7	4	4	4	5	4	5	5	1	1	3	3	30	5	4	4	3
0	2	High	3	Belgium	222A676	15	3	2003	MSK Kee	1	2	22	2	2017	5		5		2		2		2		1	1	6	6	7	1	6	5	4	7	7	5	4	6	6	6	1	1	4	1	0	6	5	4	2
0	2	High	3	Belgium	222A675	29	1	2003	MSK Kee	2	4	22	2	2017	5		5		2		2		2		1	1	5	5	3	1	6	4	5	4	5	4	5	4	5	5	1	1	2	2	0	5	4	3	5
0	2	High	3	Belgium	222A674	13	3	2003	MSK Kee	1	2	22	2	2017	5		5		2		2		2		1	1	7	4	4	3	3	3	3	4	7	5	5	5	7	7	4	1	5	6	0	6	5	7	5
0	2	High	3	Belgium	222A673	1	3	2003	MSK Kee	2	4	22	2	2017					2		2		2		1	1	4	2	1	2	6	6	6	7	6	4	4	5	6	6	1	1	5	24	0	2	4	2	5
0	2	High	3	Belgium	222A672	14	5	2003	MSK Kee	2	4	22	2	2017	4		3		2		2		2		1	5	6	4	4	4	5	4	3	5	5	6	3	5	5	6	3	2	3	5	0	4	3	1	3
0	2	High	3	Belgium	222A671	30	6	2003	MSK Kee	1	2	22	2	2017	3		3		2		2		2		1	1	6	6	4	4	5	4	3	5	6	5	3	7	5	5	1	1	3	0	40	4	4	4	3
0	2	High	3	Belgium	222A670	17	6	2002	MSK Kee	2	4	22	2	2017	5		4		5	Canada	5	Canada	5	English	1	1	4	4	4	5	5	4	4	5	7	4	6	7	6	6	7	5	2	2	15	4	4	3	3
0	2	High	3	Belgium	222A669	3	1	2003	MSK Kee	2	4	22	2	2017	4				2		2		2		1	1	6	4	4	3	5	6	6	5	5	7	6	6	6	5	1	1	2	3	0	4	5	5	5
0	2	High	3	Belgium	222A420	21	8	2004	MSK Kee	1	2	16	2	2017	3		3		2		2		2		1	1	6	4	6	4	5	4	2	5	6	7	3	6	6	5	6	3	3			6	3	4	5
0	2	High	3	Belgium	222A419	6	4	2004	MSK Kee	2	4	16	2	2017	4		4		2		2		2		1	1	7	5	4	6	4	4	3	4	7	7	7	5	5	6	1	1	3	3		5	4	3	4
0	2	High	3	Belgium	222A418	27	12	2003	MSK Kee	2	4	14	2	2017		salesman		teacher	2		5	america	2		1	1	6	5	4	4	7	5	5	6	7	7	7	7	6	7	5	5	2	4		4	4	4	4
0	2	High	3	Belgium	222A417	1	2	2004	MSK Kee	1	2	16	2	2017	5		5		2		5	Wales. I	5	English	1	1	7	6	7	7	6	6	5	6	7	6	6	6	6	6	4	4	3	7		6	3	3	3
0	2	High	3	Belgium	222A416	30	3	2004	MSK Kee	2	4	14	2	2017			5		2		2		2		1	5	5	6	7	4	6	5	5	5	4	3	5	4	5	5	5	4	2	2	40	6	5	6	4
0	2	High	3	Belgium	222A415	4	10	2004	MSK Kee	2	4	16	2	2017				cassier	2		2		5	French	1	5	5	4	5	5	3	4	5	5	5	5	5	5	4	4	4	4	1			4	5	4	3
0	2	High	3	Belgium	222A414	6	4	2004	MSK Kee	2	4	16	2	2017	4		4		2		2		2		3	1	5	2	2	3	6	3	4	6	7	5	4	6	7	7	2	2	3	4		4	7	6	6
0	2	High	3	Belgium	222A413	22	6	2004	MSK Kee	2	4	14	2	2017				child care	2		2		2		1	5	6	4	6	4	5	4	5	5	4	4	4	4	7	7	3	1	4	8	30	4	3	4	4
0	2	High	3	Belgium	222A412	27	2	2004	MSK Kee	2	4	16	2	2017	4		4		2		2		2		1	1	6	5	4	3	7	6	5	6	7	5	5	6	6	6	1	1	2			5	5	3	3
0	2	High	3	Belgium	222A411	8	1	2004	MSK Kee	1	2	14	2	2017					2		2		2		1	5	5	5	7	5	6	6	6	6	7	6	7	7	7	7	1	1	4	9	15	5	5	6	4
0	2	High	3	Belgium	222A410	22	12	2004	MSK Kee	2	4	16	2	2017	3		3		2		2		2		1	3	5	4	4	5	1	1	1	2	4	2	2	4	4	3	1	1	1			5	4	3	3
0	2	High	3	Belgium	222A409	7	4	2004	MSK Kee	2	4	14	2	2017		pilot			2		5	italy	2		1	3	5	5	5	4	4	3	3	5	4	5	3	5	5	4	1	1	1			4	3	3	2
0	2	High	3	Belgium	222A408	5	10	2004	MSK Kee	1	2	16	2	2017	5		4		2		5	England	5	English	1	3	5	4	3	3	5	5	5	4	5	5	4	5	4	4	1	1	4	5		4	4	4	4
0	2	High	3	Belgium	222A407	21	11	2004	MSK Kee	1	2	16	2	2017				teacher	2		2		2		1	1	5	5	5	6	5	6	6	6	6	6	6	7	5	5	1	1	2	3	30	3	5	3	4
0	2	High	3	Belgium	222A406	28	6	2004	MSK Kee	2	4	14	2	2017			4		2		2		2		4	3	4	4	3	5	4	4	3	4	4	4	4	3	4	5	1	1	1	0	15	4	4	3	3
0	2	High	3	Belgium	222A227	12	5	2003	MSK Kee	1	2	16	2	2017		driver at KU Leuven		works at ocmw	2		2		2		1	3	6	4	6	4	6	4	7	5	5	4	5	7	4	5	4	4	3	4	0	5	4	4	5
0	2	High	3	Belgium	222A226	16	12	2004	MSK Kee	2	4	16	2	2017		own company		own company	2		5	Spain	5	Spanish/	1	1	7	4	5	5	6	6	5	7	5	4	5	5	5	5	1	1	3	4	30	4	4	4	4
0	2	High	3	Belgium	222A225	11	10	2003	MSK Kee	2	4	14	2	2017	5		4		2		2		2		4	1	6	5	6	4	3	5	5	7	7	4	4	6	6	5	1	1	2	2	0	5	3	3	1
0	2	High	3	Belgium	222A224	31	12	2003	MSK Kee	1	2	17	2	2017		insurance-agent		insurance-agent	2		2		2		1	1	5	6	4	3	5	7	4	4	7	6	5	7	5	5	4	3	2	1	30	5	3	1	3
0	2	High	3	Belgium	222A223	7	5	2003	MSK Kee	2	4	17	2	2017	5		5		2		2		2		1	1	7	6	6	4	7	5	3	6	5	4	3	4	6	6	3	3	4	6	30	5	6	6	5
0	2	High	3	Belgium	222A222	11	8	2003	MSK Kee	1	2	17	2	2017	5		5		2		5	France	2		1	1	6	7	7	6	5	4	1	3	5	4	2	1	4	5	4	1	3	3	0	4	3	3	3
0	2	High	3	Belgium	222A221	29	3	2003	MSK Kee	2	4	17	2	2017	4		4		5	Kazachst	2		2		1	1	5	3	6	3	5	4	3	5	7	7	4	7	5	5	1	2	2	2	0	4	4	3	4
0	2	High	3	Belgium	222A220	19	9	2003	MSK Kee	2	4	17	2	2017		events		wedding planner	2		2		2		1	1	5	5	4	2	5	6	6	5	7	6	6	7	6	6	4	3	3	10	0	4	4	3	5
0	2	High	3	Belgium	222A219	26	12	2002	MSK Kee	2	4	17	2	2017		pilot	3		2		2		2		1	5	4	5	4	4	6	3	3	4	6	4	5	4	7	6	3	2	2	1	15	4	4	3	6
0	2	High	3	Belgium	222A218	12	5	2004	MSK Kee	2	4	14	2	2017	5		5		2		2		2		1	1	6	4	4	5	6	6	5	6	7	7	7	5	6	6	4	3	5	27	45	7	7	6	7
0	2	High	3	Belgium	222A182	17	6	2004	MSK Kee	1	2	16	2	2017	5		5		2		2		2		1	1	7	6	7	5	4	3	3	4	6	7	7	5	6	7	3	1	3	6	30	7	5	5	3
0	2	High	3	Belgium	222A181	20	2	2004	MSK Kee	2	4	14	2	2017	4		5		2		2		2		3	1	7	5	4	2	5	5	5	6	7	7	7	7	5	5	4	3	4	10	50	6	5	4	4
0	2	High	3	Belgium	222A180	27	6	2004	MSK Kee	1	2	16	2	2017		chef		own boss	2		2		2		1	1	5	4	6	5	7	4	5	7	7	4	5	7	4	5	1	1	4	1	30	5	4	4	4
0	2	High	3	Belgium	222A179	22	7	2004	MSK Kee	1	2	16	2	2017				insurances	2		2		2		1	3	7	4	5	4	4	4	4	5	7	6	5	6	5	5	4	3	3	4	30	5	5	4	4
0	2	High	3	Belgium	222A178	27	5	2004	MSK Kee	1	2	16	2	2017	2		5		2		2		2		1	1	7	7	4	1	7	7	7	7	7	6	6	4	6	6	1	1	3	10	0	7	7	4	4
0	2	High	3	Belgium	222A177	4	7	2004	MSK Kee	1	2	14	2	2017	4		4		2		5	China	5	Chinese	1	1	5	4	4	5	5	6	6	6	6	6	5	6	6	6	5	5	4	6	30	5	5	5	6
0	2	High	3	Belgium	222A176	10	11	2003	MSK Kee	1	2	16	2	2017	5		5		5	Togo	5	Togo en	5	French e	1	5	7	7	6	6	7	7	6	7	7	7	7	7	5	6	7	5	5	14	0	6	5	5	6
0	2	High	3	Belgium	222A175	29	12	2004	MSK Kee	1	2	16	2	2017		electricity		designer	2		2		2		1	1	5	6	5	4	4	5	4	5	5	4	5	5	5	5	3	3	2	5	0	5	4	5	4
0	2	High	3	Belgium	222A174	28	6	2004	MSK Kee	2	4	16	2	2017	5		5		2		2		2		3	1	5	7	4	3	7	3	1	4	4	3	4	4	3	3	1	1	3	5	0	5	5	4	4
0	2	High	3	Belgium	222A148	24	3	2003	MSK Kee	2	4	22	2	2017				export manager	5	Italië	5	Turkey	5	Italian	1	5	7	6	4	6	6	6	4	6	5	4	6	5	6	6	6	6	3			4	6	4	5
0	2	High	3	Belgium	222A139	20	9	2004	MSK Kee	1	2	16	2	2017		pilot	5		2		2		2		1	5	7	5	4	3	6	5	4	5	7	6	6	7	6	6	1	1	2	2	30	5	4	3	3
0	2	High	3	Belgium	222A138	5	7	2003	MSK Kee	2	4	14	2	2017				accountant	2				2		1	1	7	5	4	4	4	5	4	4	6	4	4	4	3	3	4	4	2	1	0	4	3	3	4
0	2	High	3	Belgium	222A137	24	12	2004	MSK Kee	2	4	14	2	2017			4		2		2		2		1	1	5	4	4	4	6	6	5	5	6	7	6	6	5	5	5	5	3	5	30	4	5	4	5
0	2	High	3	Belgium	222A136	2	12	2004	MSK Kee	2	4	14	2	2017		salesman of hair products		hair dresser	2		5	Argentin	2		1	3	6	4	3	1	6	1	4	5	5	6	7	6	4	4	2	2	2	4	0	4	5	4	5
0	2	High	3	Belgium	222A135	16	7	2003	MSK Kee	2	4	14	2	2017	4		3		2		2		2		1	3	6	5	4	3	3	3	5	4	5	4	5	4	5	5	5	4	4	4	0	5	5	6	3
0	2	High	3	Belgium	222A134	22	7	2003	MSK Kee	2	4	14	2	2017		architect		secretary	5	Russia	2		5	French	3	1	5	1	4	4	5	6	4	5	7	7	4	4	4	5	5	4	2			4	4	4	4
0	2	High	3	Belgium	222A133	17	12	2004	MSK Kee	1	2	14	2	2017		SHF-coordinator			2		2		2		1	3	7	5	6	4	7	5	4	7	7	7	7	7	6	6	1	1	3	4	0	7	5	4	3
0	2	High	3	Belgium	222A132	10	2	2004	MSK Kee	2	4	14	2	2017		works at ocmw		works at bank	2		2		2		1	5	7	4	5	4	7	7	7	7	7	7	7	7	6	6	5	5	4	15	0	5	6	6	5
0	2	High	3	Belgium	222A131	5	7	2004	MSK Kee	2	4	14	2	2017	3		4		2		2		2		1	1	7	4	4	4	7	7	5	5	7	7	6	6	7	6	4	3	2	2	0	4	1	4	1
0	2	High	3	Belgium	222A130	3	7	2004	MSK Kee	1	2	14	2	2017	5		4		2		2		2		1	1	6	5	6	7	7	4	5	5	7	4	7	7	4	4	3	3	3	4	0	5	4	5	3
0	2	High	3	Belgium	222A129	22	10	2004	MSK Kee	1	2	14	2	2017	3		4		2		2		2		1	5	7	6	6	6	4	4	5	5	6	5	5	5	4	4	5	5	5	7	0	5	4	6	5
0	2	High	3	Belgium	222A128	3	3	2004	MSK Kee	2	4	14	2	2017				teacher	2		2		2		1	1	5	5	4		5	5	4	6	6	6	6	6	6	5	1	1	3			5	5	4
0	2	High	3	Belgium	222A127	15	3	2004	MSK Kee	2	4	14	2	2017			4		2		2		2		1	5	4	4	4	3	6	5	5	6	7	6	6	7	6	5	3	2	3	12	0	4	3	2	3
0	2	High	3	Belgium	222A126	28	2	2004	MSK Kee	1	2	14	2	2017	5			teacher	2		2		2		4	3	7	5	5	4	5	4	4	4	7	6	6	7	6	5	3	3	3	4	0	5	5	5	4
0	2	High	3	Belgium	222A125	14	4	2004	MSK Kee	1	2	14	2	2017		civil engineer	4		2		2		2		1	1	5	2	3	3	5	6	4	5	7	7	6	6	5	5	5	4	3	4	0	4	4	3	3
0	2	High	3	Belgium	222A124	22	5	2004	MSK Kee	1	2			2017	4		4		2		2		2		4	1	5	4	3	4	7	4	5	7	7	7	7	7	6	7	1	1	5	12	0	5	4	5	6
0	2	High	3	Belgium	222A123	10	3	2004	MSK Kee	2	4	14	2	2017		boss of bus-company		secretary	2		2		2		1	1	5	4	5	1	7	7	4	6	6	6	6	6	6	5	1	1	3	8	0	3	3	3	3
0	2	High	3	Belgium	222A122	18	11	2004	MSK Kee	1	2	14	2	2017	5		5		2		5	The Neth	5	Dutch en	1	1	7	7	5	4	4	4	4	3	7	7	7	7	6	6	1	1	5	8	30	5	6	6	5
0	2	High	3	Belgium	222A121	29	12	2004	MSK Kee	1	2	14	2	2017		ict	5		2		2		2		3	3	7	4	5	5	7	5	6	4	7	5	6	5	6	6	4	5	3	5	30	4	5	4	3
0	2	High	3	Belgium	222A089	5	4	2004	MSK Kee	2	4	20	2	2017		server in army		employee of store (aldi)	2		2		2		1	5	5	5	3	5	5	5	5	5	7	7	7	7	5	5	4	4	5	10	30	6	5	5	3
0	2	High	3	Belgium	222A088	11	7	2004	MSK Kee	2	4	14	2	2017	5			doctor	2		2		2		1	1	4	7	5	5	7	6	6	7	7	5	7	6	6	6	6	5	5	10	30	5	5	4	4
0	2	High	3	Belgium	222A060	7	7	2004	MSK Kee	1	2	20	2	2017		nurse		nurse	2		2		2		1	1	5	7	5	1	7	7	6	6	7	7	7	7	5	5	5	1	5	8	30	6	4	5	5
0	2	High	3	Belgium	222A059	16	5	2003	MSK Kee	2	4	20	2	2017		employee at Aldi			2		2		2		1	1	5	5	3	3	5	4	5	5	7	5	5	5	4	4	1	1	2	4	0	3	3	3	3
0	2	High	3	Belgium	222A058	11	3	2004	MSK Kee	1	2	20	2	2017		lights	5		2		5	Tunis an	5	Danish	1	1	5	6	7	6	6	1	4	7	7	7	7	5	6	6	7	7	3	6	30	5	4	5	5
0	2	High	3	Belgium	222A057	8	3	2005	MSK Kee	1	2	20	2	2017				accountant	2		2		2		1	5	5	4	3	3	4	5	4	4	7	4	5	5	5	5	3	3	3	3	0	4	4	3	3
0	2	High	3	Belgium	222A056	20	8	2004	MSK Kee	2	4	20	2	2017	5		5		2		5	Congo	5	Lingala	1	1	4	3	3	3	4	2	3	4	1	1	2	2	5	4	7	7	2	3	0	7	7	7	5
0	2	High	3	Belgium	222A055	25	6	2003	MSK Kee	2	4	20	2	2017		salesman		house wife	2		2		2		1	5	5	3	4	4	5	6	5	6	6	5	5	6	6	5	1	1	3	2	15	5	3	3	4
0	2	High	3	Belgium	222A054	15	11	2004	MSK Kee	2	4	20	2	2017	1		5		2		5	France	2		1	3	5	4	4	4	7	5	5	7	7	5	5	7	7	5	4	3	3	4	0	5	4	4	4
0	2	High	3	Belgium	222A053	6	8	2004	MSK Kee	2	4	20	2	2017	1		1		2		2		2		1	1	6	4	3	4	6	7	5	7	5	7	5	6	6	5	1	1	3	7	0	5	5	5	6
0	2	High	3	Belgium	222A052	18	6	2004	MSK Kee	1	2	20	2	2017		salesman		midwife	2		2		2		1	1	6	4	2	1	4	7	5	5	7	6	6	7	5	5	1	1	5	18	30	3	4	6	2
0	2	High	3	Belgium	222A051	5	7	2004	MSK Kee	2	4	20	2	2017	4		3		2		2		2		1	3	7	7	7	6	7	5	6	7	7	7	7	7	5	6	4	1	3	2	0	7	3	7	3
0	2	High	3	Belgium	222A050	31	3	2004	MSK Kee	1	2		2	2017		boss		has store	2		2		2		1	5	3	6	5	3	6	4	4	6	5	4	3	5	4	4	3	2	5	9	0	5	4	3	4
0	2	High	3	Belgium	222A049	2	1	2004	MSK Kee	1	2	20	2	2017		laborant		accountant	2		2		2		1	1	4	3	3	4	7	7	7	7	7	7	7	7	7	5	6	6	2	3	0	4	5	3	1
0	2	High	3	Belgium	222A048	10	12	2003	MSK Kee	2	4	17	2	2017				secretary	2		2		2		1	1	4	2	3	2	5	4	3	6	5	5	6	6	6	6	2	2	2	1	0	4	4	3	5
0	2	High	3	Belgium	222A047	7	2	2004	MSK Kee	1	2	26	2	2017					2		5	Spain	2		1	5	6	7	5	5	5	6	4	5	7	7	6	7	6	6	1	4	3	7	0	1	5	4	3
0	2	High	3	Belgium	222A046	18	3	2004	MSK Kee	2	4	16	2	2017		has his own company			2		5	Afrika	5	French	1	3	6	4	5	4	7	6	4	7	7	4	5	6	5	5	1	1	3	3	0	5	4	5	4
0	2	High	3	Belgium	211A541	7	3	2002	BUSLEYD	2	4	13	2	2017	2		3		2		2		2		1	5	7	5	5	4	7	7	3	7	7	1	3	7	5	5	1	1	2	0	40	3	3	3	3
0	2	High	3	Belgium	211A540	15	2	2002	BUSLEYD	2	4	13	2	2017			4		2		5	Morrocco	5	berbers	1	1	5	4	4	5	5	5	5	5	5	5	5	4	4	4	4	5	2	2	0	4	4	5	4
0	2	High	3	Belgium	211A539	18	6	2003	BUSLEYD	2	4	13	2	2017					2		5	Turkey	5	Assyrian	1	1	4	7	7	7	7	1	4	7	7	1	4	1	5	4	7	7	1			7	4	1	1
0	2	High	3	Belgium	211A538	5	12	2002	BUSLEYD	2	4	13	2	2017	3		3		2		5	germany	2		1	1	4	4	4	4	5	5	5	6	5	5	6	6	6	5	3	3	1			2	5	3
0	2	High	3	Belgium	211A537	22	2	2002	BUSLEYD	2	4	13	2	2017	3		1		2				2		1	1	4	1	4	2	5	6	5	4	5	5	6	6	5	5	7	6	2	4	0	4	5	3	6
0	2	High	3	Belgium	211A536	13	5	2002	BUSLEYD	1	2	13	2	2017	5		4		2		2		2		1	1	5	7	5	6	7	7	7	7	5	3	1	1	4	5	6	3	2	3	30	5	4	6	4
0	2	High	3	Belgium	211A535	24	10	2001	BUSLEYD	2	4	13	2	2017	1		1		5	Spain	5	Morrocco	5	BERBERS	4	1	7	4	4	5	4	5	3	5	5	5	7	6	4	4	7	7	1			3	4	1	4
0	2	High	3	Belgium	211A534	11	4	2003	BUSLEYD	2	4	13	2	2017	3		4		5	The Neth	5	Morrocco	5	Morrocco	4	1	5	5	2	3	5	3	3	4	6	7	7	7	5	4	7	7	2	3	20	4	5	4	4
0	2	High	3	Belgium	211A533	4	3	2001	BUSLEYD			13	2	2017		musicien			2		5	Hungary	2		1	5	4	2	4	2	6	6	5	4	4	3	3	4	2	3	7	7	2	0	5	1	2	2	2
0	2	High	3	Belgium	211A532	10	3	2003	BUSLEYD	2	4	13	2	2017	3		4		2		5	Morrocco	2		1	1	4	4	1	4	7	4	4	7	7	7	7	7	5	4	7	4	2	0	30	7	1	1	1
0	2	High	3	Belgium	211A531	13	12	2002	BUSLEYD	2	4	13	2	2017		own boss		nurse	2		2		2		1	1	5	5	3	4	6	4	4	6	5	5	5	5	4	6	7	5	3	1	0	3	3	3	3
0	2	High	3	Belgium	211A530	6	10	2002	BUSLEYD	2	4	13	2	2017			2		2		2		2		1	4	5	6	6	3	6	4	4	5	7	7	7	7	5	5	1	1	2	2	0	3	4	4	4
0	2	High	3	Belgium	2111A655	2	5	2003	DOM BOS	1	2	20	2	2017	5		5		2		2		2		1	1	4	3	3	4	4	3	4	6	5	4	5	5	5	5	3	2	2	3	18	3	3	2	2
0	2	High	3	Belgium	2111A641	9	4	2003	DOM BOS	2	4	20	2	2017		accountant restaurant owner	3		2		2		2		1	3	5	5	4	3	7	7	5	7	6	6	4	7	5	5	1	1	5	16		4	4	3	3
0	2	High	3	Belgium	2111A640	10	7	2003	DOM BOS	2	4	20	2	2017	5		5		2		2		2		1	1	6	4	4	4	7	6	5	6	6	5	5	5	7	6	4	3	5	6	30	4	5	3	4
0	2	High	3	Belgium	2111A639	9	12	2003	DOM BOS	1	2	20	2	2017		marketing		psychologist	2		2		2		1	1	5	3	4	4	7	4	5	6	7	5	7	6	2	3	4	3	2	3	30	4	5	3	3
0	2	High	3	Belgium	2111A638	16	8	2003	DOM BOS	1	2	20	2	2017	5		5		2		2		2		1	1	6	5	5	3	7	4	7	6	7	6	6	7	4	6	4	2	4			6	4	4	4
0	2	High	3	Belgium	2111A637	8	4	2003	DOM BOS	2	4	20	2	2017		teacher	5		2		2		2		1	3	5	4	4	4	5	7	6	7	4	5	5	4	6	5	3	3	4	5	0	4	3	3	3
0	2	High	3	Belgium	2111A636	27	2	2003	DOM BOS	2	4	20	2	2017	4		4		2		2		2		1	1	6	3	5	4	5	5	5	5	7	7	6	6	6	6	4	4	5	7	50	4	3	3	3
0	2	High	3	Belgium	2111A635	7	4	2003	DOM BOS	2	4	20	2	2017	4		5		2		2		2		1	1	5	4	5	4	5	5	6	5	6	5	5	6	5	5	1	1	4	6	30	5	3	3	4
0	2	High	3	Belgium	2111A634	24	11	2003	DOM BOS	2	4	20	2	2017	4		4		2		2		2		1	1	5	4	6	4	6	6		5	7	4	4	5	5	5	4	3	2	2	0	5	5	3	4
0	2	High	3	Belgium	2111A632	14	4	2003	DOM BOS	2	4	20	2	2017	5		5		2		5	CANADA	2		1	1	7	4	5	4	7	6	7	7	7	7	7	7	7	7	5	5	5	7	30	5	4	4	4
0	2	High	3	Belgium	2111A631	24	8	2004	DOM BOS	1	2	20	2	2017				cleaning	2		2		2		4	5	6	5	5		4	4	3	4	5	3	3	3	5	4	4	3	3	2	0	4	3	3	3
0	2	High	3	Belgium	2111A623	7	2	2002	DOM BOS	1	2	20	2	2017	5		5		5	CONGO	5	CONGO	5	French L	4	3	5	4	4	3	5	4	4	5	5	3	5	5	5	6	4	4	2	1	30	4	5	5	4
0	2	High	3	Belgium	2111A622	13	9	2003	DOM BOS	1	2	20	2	2017	5		4		2		5	poland e	5	Polish	1	1	6	6	6	5	5	4	5	4	7	5	6	5	6	5	4	5	4	9	0	6	6	5	5
0	2	High	3	Belgium	2111A621	18	7		DOM BOS	2	4	20	2	2017	5		5		2		2		2		1	3	7	7	7	4	7	7	6	6	4	1	1	4	6	5	2	3	5	9	30	4	3	6	2
0	2	High	3	Belgium	2111A620	2	5	2003	DOM BOS	1	2	20	2	2017	5		5		2		2		2		4	1	7	5	5	6	7	7	7	6	3	1	1	2	5	5	4	2	5	10	0	5	6	5	4
0	2	High	3	Belgium	2111A619	26	8	2003	DOM BOS	1	2	20	2	2017	5		5		2		2		2		1	1	7	7	6	3	6	6	5	6	6	4	4	7	7	7	6	6	4	8	0	4	6	6	6
0	2	High	3	Belgium	2111A618	26	4	2003	DOM BOS	1	2	20	2	2017			5		2		2		2		1	1	7	6	5	5	6	6	5	6	5	5	6	6	7	6	6	7	5	11	45	5	6	6	6
0	2	High	3	Belgium	2111A617	19	12	2003	DOM BOS	2	4	20	2	2017	5		4		2		2		2		1	3	4	4	5	3	7	5	5	5	7	5	6	7	6	5	1	1	2	2	30	4	4	3	3
0	2	High	3	Belgium	2111A616	20	6	2003	DOM BOS	2	4	20	2	2017	5		3		2		2		2		1	1	6	5	6	4	7	6	4	7	7	7	7	6	5	4	4	5	2	1	15	4	4	4	4
0	2	High	3	Belgium	2111A615	3	7	2003	DOM BOS	2	4	20	2	2017		teacher	4		2		2		2		1	5	6	5	5	4	5	6	5	5	4	3	3	5	4	4	4	3	5	0	20	5	5	4	4
0	2	High	3	Belgium	2111A614	17	2	2003	DOM BOS	1	2	20	2	2017	5		5		2		2		2		1	1	5	6	6	5	4	4	3	5	6	5	4	4	5	5	3	2	1			5	4	3	4
0	2	High	3	Belgium	2111A613	14	2	2003	DOM BOS	1	2	20	2	2017			4		2		5	NIGERIA	2		1	3	5	6	7	3	5	4	3	6	3	2	5	5	5	4	3	3	3	6	0	5	4	3	4
0	2	High	3	Belgium	2111A612	4	7	2003	DOM BOS	1	2	20	2	2017	4		4		2		2		2		1	3	5	4	4	3	6	3	4	5	5	4	5	5	6	5	3	3	3	10	15	4	5	5	4
0	2	High	3	Belgium	2111A611	11	3	2003	DOM BOS	2	4	20	2	2017		no daddy			2		2		2		1	5	4	2	3	2	5	1	4	7	7	4	4	5	6	4	2	3	2	3	30	5	5	4	4
0	2	High	3	Belgium	2111A610	11	9	2003	DOM BOS	2	4	20	2	2017	5		4		2		2		2		1	1	5	4	6	4	5	5	6	4	4	3	3	4	4	5	5	3	3	3	45	4	5	3	4
0	2	High	3	Belgium	2111A609	17	11	2003	DOM BOS	2	4	20	2	2017	4		4		2		2		2		1	5	5	3	4	2	5	4	3	4	5	4	5	6	6	6	5	2	2	1		5	5	4	4
0	2	High	3	Belgium	2111A608	8	7	2003	DOM BOS	1	2	20	2	2017		teacher		teacher	2		2		2		1	1	5	7	7	4	6	5	7	7	7	7	7	7	6	7	3	3	5	12	0	6	6	5	4
0	2	High	3	Belgium	2111A607	21	11	2003	DOM BOS	1	2	20	2	2017				midwife	2		2		2		1	5	6	4	6	5	6	6	5	6	6	6	5	5	5	5	1	1	3	5	0	5	6	6	4
0	2	High	3	Belgium	2111A606	15	1	2003	DOM BOS	2	4	20	2	2017			5		2		5	The Neth	2		1	1	6	4	4	4	7	5	4	6	7	6	4	7	5	5	4	3	3	7	0	4	4	2	4
0	2	High	3	Belgium	2111A605	23	2	2003	DOM BOS	2	4	20	2	2017		teamleader	5		2		5	CONGO	2		1	1	6	4	2	3	6	6	4	5	7	5	4	6	6	5	4	3	2	1	30	5	5	4	5
0	2	High	3	Belgium	2111A604	21	6	2003	DOM BOS	1	2	20	2	2017	5		5		2		2		5	French	1	1	5	1	4	3	6	4	5	5	7	6	7	7	6	5	6	4	4	6	30	3	4	5	4
0	2	High	3	Belgium	2111A603	11	3	2003	DOM BOS	2	4	20	2	2017		investment		bank	2		2		2		1	5	6	6	4	4	6	6	5	4	7	6	4	4	6	6	4	3	3	4	0	4	5	3	4
0	2	High	3	Belgium	2111A602	3	2	2003	DOM BOS	2	4	20	2	2017	3		3		2		2		2		1	1	5	2	5	2	6	5	4	5	7	5	7	7	6	6	1	1	1	1	0	5	2	3	2
0	2	High	3	Belgium	2111A601	5	2	2003	DOM BOS	2	4	20	2	2017	5		4		2		2		2		1	1	6	4	5	2	6	5	5	6	7	7	6	7	6	6	3	2	3	3	0	4	5	3	4
0	2	High	3	Belgium	2111A600	16	9	2003	DOM BOS	1	2	20	2	2017		bus driver	5		2		5	CONGO	2		1	5	5	6	4	4	4	5	3	5	5	4	4	6	5	5	4	4	3	4	30	3	4	3	3
0	2	High	3	Belgium	2111A599	25	11	2003	DOM BOS	1	2	20	2	2017	5		5		2		2		2		1	1	6	5	3	4	5	6	4	5	5	4	7		6	5	3	2	3	6	0	5	5	4	2
0	2	High	3	Belgium	2111A598	4	11	2003	DOM BOS	2	4	20	2	2017	5		1		2		2		2		1	1	6	3	4	2	6	4	6	5	5	2	1	1	5	4	5	3	3	4	30	4	4	6	3
0	2	High	3	Belgium	2111A597	8	7	2003	DOM BOS	2	4	20	2	2017	3		4		2		5	AFRIKA	2		1	1	6	6	7	5	4	6	4	4	7	6	4	5	5	5	1	1	3	3	30	6	5	4	3
0	2	High	3	Belgium	2111A596	21	3	2003	DOM BOS	2	4	20	2	2017	3		4		2		2		2		1	1	7	4	5	3	6	6	6	7	5	4	4	3	4	3	2	1	2	1	0	3	3	2	4
0	2	High	3	Belgium	2111A595	8	5	2003	DOM BOS	1	2	20	2	2017	5		5		2		2		2		1	1	5	4	4	4	4	4	5	6	6	5	7	5	6	6	3	1	3	5	0	4	4	2	4
0	2	High	3	Belgium	2111A594	15	2	2003	DOM BOS	1	2	20	2	2017	3		4		2		2		2		1	3	5	6	4	3	4	4	4	4	7	6	6	6	6	6	5	5	5	7	30	4	5	5	5
0	2	High	3	Belgium	2111A593	20	11	2003	DOM BOS	1	2	20	2	2017		engineer			2		2		2		1	1	5	4	5	3	5	5	4	5	6	5	5	5	5	5	5	5	3	5	30	4	4	5	4
0	2	High	3	Belgium	2111A592	16	6	2003	DOM BOS	2	4	20	2	2017		chef		accountant	2		5	The Neth	2		4	1	4	1	5	5	5	5	6	5	6	5	6	5	6	6	5	5	3	24		5	5	4	4
0	2	High	3	Belgium	2111A591	16	7	2003	DOM BOS	1	2	20	2	2017	5		4		2		2		2		1	1	7	5	4	5	6	7	4	6	7	5	7	7	6	6	4	4	4	5	30	5	6	6	4
0	2	High	3	Belgium	2111A590	10	9	2003	DOM BOS	1	2	20	2	2017	5		4		2		5	germany	2		1	1	5	4	5	3	5	5	5	6	4	4	4	4	4	4	3	4	2	1	0	4	4	3	3
0	2	High	3	Belgium	2111A589	26	11	2004	DOM BOS	2	4		2	2017		architect			2		2		2		1	5	6	4	4	4	6	6	6	7	7	7	7	7	4	5	3	3	2	3	0	6	5	4	4
0	2	High	3	Belgium	2111A588	6	2	2003	DOM BOS	1	2	20	2	2017	5		5		2		2		2		1	1	6	4	4	4	6	3	6	5	7	4	6	7	6	6	5	5	3	6	0	5	6	6	4
0	2	High	3	Belgium	2111A576	31	3	2003	DOM BOS	1	2	20	2	2017		gardener		cleaning	2		2		2		1	1	5	4	5	3	6	6	4	7	7	6	6	7	5	5	4	5	4	8	0	5	4	3	3
0	2	High	3	Belgium	2111A575	23	1	2003	DOM BOS	1	2	20	2	2017	4		4		2		2		2		1	1	4	5	7	5	6	7	5	5	7	5	5	5	5	4	3	1	3	5		5	4	5	5
0	2	High	3	Belgium	2111A574	12	6	2003	DOM BOS	1	2	20	2	2017	5		5		2		2		2		1	1	4	5	4	6	7	5	4	6	7	4	4	4	4	6	2	1	3	2	11	4	3	5	4
0	2	High	3	Belgium	2111A573	23	12	2003	DOM BOS	2	4	20	2	2017		ict manager		bank	2		2		2		1	1	7	4	5	4	7	4	5	5	7	4	5	6	5	5	4	4	3	7	30	5	5	3	4
0	2	High	3	Belgium	2111A572	8	8	2003	DOM BOS	2	4	20	2	2017	5		5		2		2		2		1	1	4	3	4	2	5		6	5	6	5	5	5	5	4	4	4	3	3	10	5	3	3	2
0	2	High	3	Belgium	2111A571	4	2	2004	DOM BOS	1	2	20	2	2017	5		5		2		2		2		1	1	6	4	5	4	7	6	6	5	6	4	6	6	5	6	4	3	4	9	0	5	4	3	3
0	2	High	3	Belgium	2111A570	17	7	2004	DOM BOS	1	2	20	2	2017	5		5		2		2		2		1	1	4	4	4	3	5	5	5	7	7	7	6	7	6	6	6	5	4	8		5	5	4	4
0	2	High	3	Belgium	2111A569	1	6	2004	DOM BOS	2	4	20	2	2017	5		5		2		2		2		1	3	5	4	5	4	7	6	6	7	7	5	7	7	6	5	3	4	2	2	0	4	3	3	5
0	2	High	3	Belgium	2111A568	27	4	2004	DOM BOS	2	4	20	2	2017	5		5		2		5	AUSTRALI	2		1	1	5	4	4	2	6	6	5	5	6	7	6	7	5	4	4	4	4	8	30	4	3	4	3
0	2	High	3	Belgium	2111A567	26	8	2003	DOM BOS	2	4	20	2	2017	4		4		2		5	The Neth	2		1	1	6	6	5	4	5	3	4	4	7	4	5	6	5	6	4	4	3	5	10	4	5	5	4
0	2	High	3	Belgium	2111A566	7	3	2003	DOM BOS	2	4	20	2	2017	3		5		2		2		2		1	1	6	4	4	3	6	6	5	6	7	6	6	7	6	6	1	1	3	2	45	4	5	6	5
0	2	High	3	Belgium	2111A565	8	7	2003	DOM BOS	2	4	20	2	2017	4		5		2		2		2		1	1	6	6	5	5	7	7	6	7	5	4	4	5	3	3	1	1	2	2	0	5	4	4	3
0	2	High	3	Belgium	2111A564	13	1	2004	DOM BOS	1	2	20	2	2017	4		5		2		2		2		1	1	5	7	5	4	5	4	4	7	7	7	7	7	5	5	7	1	1	0	0	4	4	3	4
0	2	High	3	Belgium	2111A563	24	3	2004	DOM BOS	1	2	17	2	2017	5		5		2		2		2		1	1	6	7	7	5	4	5	5	5	7	5	7	7	7	5	1	1	4	6	0	5	7	6	5
0	2	High	3	Belgium	2111A562	30	5	2003	DOM BOS	1	2	20	2	2017	3		5		2		2		2		1	1	6	5	5	4	5	3	3	6	7	5	4	5	6	6	1	1	3	3	0	5	6	5	5
0	2	High	3	Belgium	2111A561	24	9	2003	DOM BOS	1	2	20	2	2017	5		4		2		2		2		1	1	5	3	4		6	6	6	6	6	6	6	6	5	5	5	4	4	6		5	5	4
0	2	High	3	Belgium	2111A560	21	10	2003	DOM BOS	1	2	20	2	2017	5		5		2		2		2		1	1	6	5	6	4	7	7	7	7	7	7	7	7	6	6	4	4	3	2	30	5	6	4	1
0	2	High	3	Belgium	2111A559	25	8	2004	DOM BOS	1	2	20	2	2017		privat banker at ing			2		2		2		4	1	7	2	4	4	3	3	3	3	6	3	5	7	5	5	2	2	3	5	30	4	4	3	4
0	2	High	3	Belgium	2111A558	28	10	2004	DOM BOS	2	4	20	2	2017	4			accountant	2		2		2		1	5	2	5	4	6	3	4	4	4	5	6	5	5	4	5	7	6	3	7	0	6	5	3	5
0	2	High	3	Belgium	2111A557	23	11	2004	DOM BOS	1	2	17	2	2017		plummer	5		2		2		2		1	1	6	7	4	3	4	4	5	5	6	7	6	6	4	4	4	3	4	7	0	4	5	3	3
0	2	High	3	Belgium	2111A556	25	5	2004	DOM BOS	1	2	20	2	2017					2		2		2		1	1	3	2	4	4	2	6	3	2	5	6	6	6	5	4	2	2	2	1		3	4	4	4
0	2	High	3	Belgium	2111A555	5	2	2003	DOM BOS	2	4	20	2	2017		air traffic coordinator		police	2		2		2		1	1	7	7	7	5	6	4	3	7	7	6	3	7	6	5	5	5	4	5	0	7	7	7	6
0	2	High	3	Belgium	2111A554	17	1	2003	DOM BOS	1	2	20	2	2017	3		5		2		2		2		1	1	5	5	4	4	5	4	5	5	6	5	6	6	5	5	4	4	5	6	0	5	5	4	4
0	2	High	3	Belgium	2111A553	21	3	2003	DOM BOS	2	4	20	2	2017	3		4		2		2		2		1	1	5	4	5	3	5	4	4	5	5	4		6	5	5	5	4	3	7	0	5	5	4	5
0	2	High	3	Belgium	2111A552	2	4	2003	DOM BOS	2	4	20	2	2017		transport coordinator		nurse	2		5	poland	2		1	1	7	3	2	3	6	6	7	6	6	5	5	5	6	5	4	4	3	8	30	4	4	3	3
0	2	High	3	Belgium	2111A551	7	8	2003	DOM BOS	1	2	20	2	2017	5		5		2		2		2		1	1	7	4	3	3	6	5	4	5	7	7	5	6	5	5	4	4	3	2	30	3	2	2	4
0	2	High	3	Belgium	2111A550	8	4	2003	DOM BOS	1	2	20	2	2017		engineer			2		2		2		1	1	5	4	4	4	4	5	4	5	5	5	4	6	5	5	4	4	3	5	30	4	4	4	4
0	2	High	3	Belgium	2111A549	6	11	2003	DOM BOS	1	2	20	2	2017	3		4		2		2		2		1	1	4	5	6	4	6	6	5	6	7	6	6	7	4	4	5	5	2	3	30	5	4	4	4
0	2	High	3	Belgium	2111A548	3	8	2004	DOM BOS	2	4	20	2	2017		civil engineer		civil engineer	2		2		5	French	1	5	5	6	6	6	5	5	6	6	6	6	6	4	7	6	2	3	4	9		6	7	7	7
0	2	High	3	Belgium	2111A547	29	7	2003	DOM BOS	1	2	20	2	2017	5		5		2		2		2		1	1	6	6	5	4	5	5	5	5	6	5	5	6	6	5	4	3	4	8	0	5	5	5	6
0	2	High	3	Belgium	2111A546	29	2	2004	DOM BOS	2	4	20	2	2017		own boss			2		2		2		1	1	4	4	5	3	4	5	4	4	6	6	6	7	4	4	4	3	4	7		3	3	3	3
0	2	High	3	Belgium	2111A545	12	8	2003	DOM BOS	2	4	20	2	2017					2		2		2		1	3	7	6	7	6	6	4	6	5	5	3	4	4	6	6	7	6	5	10	0	6	7	6	4
0	2	High	3	Belgium	2111A544	18	11	2004	DOM BOS	1	2	17	2	2017	5		5		2		5	The Neth	2		1	1	5	5	6	4	3	1	4	4	7	4	5	5	5	5	4	2	3	6	50	5	4	4	4
0	2	High	3	Belgium	2111A543	13	4	2003	DOM BOS	2	4	20	2	2017		kinesist			2		2		2		1	3	5	3	4	3	4	5	4	4	6	4	4	4	5	4	4	2	4	0	45	4	3	5	3
0	2	High	3	Belgium	2111A542	11	10	2004	DOM BOS	2	4	20	2	2017	5		5		2		2		5	French	1	3	7	4	6	5	7	7	5	5	4	3	3	4	5	4	4	2	4	6	30	5	4	6	5
0	2	High	3	Belgium	2102A334	9	4	2004	Sint-An	2	4	16	3	2017		union	5		2		2		2		1	1	4	4	4	4	5	5	6	6	5	4	4	5	5	4	4	4	2	1		4	4	3	4
0	2	High	3	Belgium	2102A333	30	9	2004	Sint-An	2	4	16	3	2017		bus driver	4		2		2		2		2	1	4	1	2	5	6	5	4	7	7	5	7	7	6	4	1	1	2	1		1	3	4	2
0	2	High	3	Belgium	2102A305	14	8	2003	Sint-An	1	2	16	3	2017		boss of construction company			2		5	Thailand	2		1	5	4	2	1	2	3	1	1	1	6	5	7	6	4	5	1	1	2	3		3	5	4	3
0	2	High	3	Belgium	2102A304	15	10	2005	Sint-An	2	4	16	3	2017	4		5		2		2		2		2	1	5	3	4	3	4	3	3	4	4	3	4	5	3	4	4	4	2	1	30	5	4	2	3
0	2	High	3	Belgium	2102A303	18	8	2004	Sint-An	2	4	16	3	2017		bank		bank	2		2		2		1	3	4	7	4	1	7	7	7	7	7	7	4	4	1	1	1	1	1			4	1	3	4
0	2	High	3	Belgium	2102A302	2	10	2003	Sint-An	2	4	16	3	2017		security agent	5		2		5	The Neth	2		1	1	7	4	4	3	4	4	4	5	5	6		6	4	5	4	3	2	1		4	5	3	4
0	2	High	3	Belgium	2102A301	14	8	2003	Sint-An	2	4	16	3	2017		retired			2		5	Thailand	5	Thai	2	1	4	2	5	4	3	2	3	4	6	3	6	6	7	6	4	2	1			3	4	6	5
0	2	High	3	Belgium	2102A300	9	3	2004	Sint-An	2	4	16	3	2017		electricien		employee	2		2		2		1	3	5	1	3	4	6	6	4	4	7	7	6	6	6	6			1			5	6	5	5
0	2	High	3	Belgium	2102A299	7	11	2004	Sint-An	1	2	16	3	2017	3		3		2				5	French	1	1	6	4	4	3	4	4	4	4	6	5	4	4
0	2	High	3	Belgium	2102A298	13	8	2002	Sint-An	1	2	16	3	2017		retired		logistics	2		2		5	Dutch	1	1	7	7	7	4	7	7	7	7	7	7	7	7	3	7	6	7	1			7	7	7	7
0	2	High	3	Belgium	2102A297	12	10	2004	Sint-An	2	4	16	3	2017	5		4		2		2		2		1	3	6	7	6	7	6	7	4	7	3	3	3	3	5	4	5	4	2	3	30	4	4	4	6
0	2	High	3	Belgium	2102A296	22	2	2004	Sint-An	1	2	16	3	2017		truck driver		nurse	2		2		2		1	1	5	7	4	4	5	4	5	6	6	6	6	6	5	5	4	4	5	0	30	5	5	3	4
0	2	High	3	Belgium	2102A295	10	9	2003	Sint-An	1	2	16	3	2017					2		2		2		1	1	6	5	4	4	4	2	3	6	7	7	7	7	4	4	2	1	2	2	45	3	3	2
0	2	High	3	Belgium	2102A294	8	3	2004	Sint-An	1	2	16	3	2017	5		4		2		2		2		1	3	7	6	7	4	5	1	1	6	7	7		7	6	7	6	5	4	5	20	7	5	7	5
0	2	High	3	Belgium	2102A293	9	9	2004	Sint-An	2	4	16	3	2017	4		4		2		2		2		1	1	5	4	4	5	7	6	6	7	7	4	7	7	4	4	5	5	2	1	30	4	6	3	4
0	2	High	3	Belgium	2102A292	12	6	2004	Sint-An	1	2	16	3	2017	4		5		2		2		2		1	1	6	4	4	4	4	5	5	6	7	7	7	7	6	5	5	4	3	4	30	4	4	4	3
0	2	High	3	Belgium	2102A283	13	5	2002	Sint-An	2	4	16	3	2017	3		4		2		5	Turkey	2		1	1	5	6	4	4	3	2	2	5	1	1	1	1	5	4	1	1	2	1	0	4	4	3	4
0	2	High	3	Belgium	2102A282	12	5	2003	Sint-An	2	4	16	3	2017	1		1		5	Tanzania	5	Burundi	5	Swahili	4	1	5	1	7	4	7	3	1	1	1	1	7	1	2	2	1	1	1	1	10	1	2	1	3
0	2	High	3	Belgium	2102A281	4	2	2004	Sint-An	1	2	16	3	2017		police officer	4		2		5	poland	2		1	3	7	7	7		7	5	5	6	7	5	6	7	6	7	4	4	5	8	30	6	5	6	5
0	2	High	3	Belgium	2102A280	13	9	2004	Sint-An	2	4	16	3	2017		accountant		chef in resting home for elderly	2		2		2		1	3	7	7	6	6	5	4	4	4	7	5	6	6	6	6	4	4	2	2	0	5	4	6	5
0	2	High	3	Belgium	2102A279	4	12	2004	Sint-An	2	4	16	3	2017	4		5		2		2		2		1	5	4	4	3	3	6	5	6	7	7	7	7	7	6	5	4	3	5	15		6	6	5	6
0	2	High	3	Belgium	2102A278	3	12	2004	Sint-An	2	4	16	3	2017				employee HR of transport company	2		2		2		1	5	7	1	4	2	7	7	6	7	7	6	7	5	7	7	4	2	2	2	40	4	7	2	3
0	2	High	3	Belgium	2102A277	11	5	2004	Sint-An	2	4	16	3	2017		bank director		boss of kindergarten	2		2		2		1	3	4	2	2	2	4	2	2	3	6	4	4	4	6	6	2	2	5	13	30	4	5	4	4
[truncated: 244 more columns]
